1 **Integration of system phenotypes in microbiome networks to identify candidate synthetic**  
2 **communities: a study of the grafted tomato rhizobiome**

3  
4 Ravin Poudel<sup>1234#</sup>, Ari Jumpponen<sup>5</sup>, Megan M. Kennelly<sup>4</sup>, Cary Rivard<sup>6</sup>, Lorena Gomez-Montano<sup>1234</sup>,  
5 and Karen A. Garrett<sup>1234#</sup>.

6 <sup>1</sup>*Department of Plant Pathology, University of Florida, Gainesville, FL 32611*

7 <sup>2</sup>*Global Food Systems Institute, University of Florida, Gainesville, FL 32611*

8 <sup>3</sup>*Emerging Pathogens Institute, University of Florida, Gainesville, FL 32611*

9 <sup>4</sup>*Department of Plant Pathology, Kansas State University, Manhattan, KS 66506*

10 <sup>5</sup>*Division of Biology and Ecological Genomics Institute, Kansas State University, Manhattan, KS 66506*

11 <sup>6</sup>*Department of Horticulture and Natural Resources, Kansas State University, Olathe, KS 66061*

12

13 <sup>#</sup>*Correspondence: Ravin Poudel and Karen A. Garrett*

14 *E-mail addresses: [rp3448@ufl.edu](mailto:rp3448@ufl.edu) and [karengarrett@ufl.edu](mailto:karengarrett@ufl.edu)*

15

16 **Running title:** Phenotype-based networks for microbial consortia design

17  
18  
19  
20  
21  
22  
23  
24  
25  
26  
27  
28  
29  
30  
31  
32  
33  
34  
35  
36  
37  
38

## **ABSTRACT**

Understanding factors influencing microbial interactions, and designing methods to identify key taxa, are complex challenges for achieving microbiome-based agriculture. Here we study how grafting and the choice of rootstock influence root-associated fungal communities in a grafted tomato system. We studied three tomato rootstocks (BHN589, RST-04-106 and Maxifort) grafted to a BHN589 scion and profiled the fungal communities in the endosphere and rhizosphere by sequencing the Internal Transcribed Spacer (ITS2). The data provided evidence for a rootstock effect (explaining ~2% of the total captured variation,  $p < 0.01$ ) on the fungal community. Moreover, the most productive rootstock, Maxifort, supported greater fungal species richness than the other rootstocks or controls. We then constructed a phenotype-OTU network analysis (PhONA) using an integrated machine learning and network analysis approach based on sequence-based fungal Operational Taxonomic Units (OTUs) and associated tomato yield data. PhONA provides a graphical framework to select a testable and manageable number of OTUs to support microbiome-enhanced agriculture. We identified differentially abundant OTUs specific to each rootstock in both endosphere and rhizosphere compartments. Subsequent analyses using PhONA identified OTUs that were directly associated with tomato fruit yield, and others that were indirectly linked to yield through their links to these OTUs. Fungal OTUs that are directly or indirectly linked with tomato yield may represent candidates for synthetic communities to be explored in agricultural systems.

39 **IMPORTANCE**

40 The realized benefits of microbiome analyses for plant health and disease management are often  
41 limited by the lack of methods to select manageable and testable synthetic microbiomes. We  
42 evaluated the composition and diversity of root-associated fungal communities from grafted  
43 tomatoes. We then constructed a phenotype-OTU network analysis (PhONA) using these linear and  
44 network models. By incorporating yield data in the network, PhONA identified OTUs that were  
45 directly predictive of tomato yield, and others that were indirectly linked to yield through their links  
46 to these OTUs. Follow-up functional studies of taxa associated with effective rootstocks, identified  
47 using approaches like PhONA, could support the design of synthetic fungal communities for  
48 microbiome-based crop production and disease management. The PhONA framework is flexible for  
49 incorporation of other phenotypic data and the underlying models can readily be generalized to  
50 accommodate other microbiome or other ‘omics data.

51

52 **KEYWORDS**

53 fungi, phenotypes, microbiome networks, model integration, grafting, tomato

## 54 **Introduction**

55 Interactions are key to defining system behaviors, structures, and outcomes. In microbial systems,  
56 interactions among organisms define their distribution, assemblies, and ecosystem functions. In  
57 addition to microbe-microbe interactions, microbes interact with their hosts, and are essential to  
58 host health and performance (1-8). In agriculture, plant-microbe interactions improve plant  
59 productivity by providing access to nutrients (9-11), reducing infection by plant pathogens (5, 12),  
60 triggering plant growth promoting factors (13, 14), and enhancing plant resistance (15, 16) and  
61 tolerance to abiotic stresses (17-19). Although the importance of microbes and host-microbe  
62 interactions to host health and ecological processes is well-known, interaction-based approaches to  
63 manage crop-production remain a scientific frontier. Past attempts to translate information about  
64 microbial interactions to design biocontrol agents or biofertilizers have often had limited efficacy  
65 and durability (20, 21). Most microbial inocula have been applied as single species, often selected  
66 based on pairwise relations of microbes with a pathogen or the host. Interactions among microbes  
67 as well as with the host are important, and the net outcome of these complex interactions defines  
68 host health and ecosystem functions(22). Thus, it is critical to understand the ecology of microbes  
69 selected for biological applications, and systems approaches centered on host-microbe interaction  
70 can help guide the selection of microbes for synthetic communities(23).

71       Among tools to better understand microbial interactions, network models of microbial  
72 communities, and studies of network structures and key groups, have proven popular for generating  
73 hypotheses about how to engineer microbial consortia. In such network models of microbiomes, a  
74 node represents an OTU, and a link exists between two OTUs if their sequence proportions are  
75 significantly associated across samples. When evaluated with other conventional measures of  
76 microbial community structures, such as diversity indices, network models can be used to identify  
77 hub taxa that may be key to maintaining microbial assemblages and diversity (24), or to evaluate  
78 changes in community complexity and interactions in response to experimental treatments (25).  
79 Microbiome networks are useful for describing general community structures and their key  
80 properties and are often the most practical option when additional information about species  
81 interactions is missing or the goal is to compare across studies with different types of data (26, 27).  
82 The utility of network analysis for identifying candidate assemblages for biocontrol can be enhanced  
83 by incorporating nodes that represent other additional types of features (28, 29). For instance, a  
84 novel association of host metadata with the microbiome was revealed in an integrated microbiome-  
85 metadata network (30), where a feature strongly associated with hub microbes can serve as a marker

86 to measure host performance. In agriculture, plant yield or other phenotypic traits can be integrated  
87 in microbiome networks, with the potential to identify microbial consortia that are predictive of host  
88 phenotypes. Because such models include host phenotypes, they facilitate finding candidate sets of  
89 OTUs that may directly or indirectly affect host phenotypic traits. Visualization of networks is often  
90 valuable for this purpose, but the real value of phenotype-based network models is their ability to  
91 infer potential candidate taxa or consortia. The hypothesized beneficial sets of OTUs may represent  
92 targets for pure culturing efforts or, if cultures exist, the sets can be further evaluated in laboratory  
93 or field studies.

94 While phenotype-based network models have the potential to identify key taxa, application  
95 of such models should be integrated with findings from other community analyses so that the  
96 inference about key taxa is biologically and ecologically meaningful. For example, plant microbiome  
97 studies indicate that a small but consistent proportion of variation in microbial communities is often  
98 explained by the host genotype (31-37), indicating the potential for genotype-based modulation of  
99 microbial communities in crop-production on a broader scale. These results support the idea of  
100 host-specific microbial community selection (38). Many such microbes may be taxa that are  
101 evolutionarily essential for the survival and function of plants (39, 40). In addition, the extent of host  
102 genotype filtering of microbes differs across the rhizosphere, rhizoplane, and endosphere, and varies  
103 from one host species to another (41-43). Results that indicate microbial filtering by different crop  
104 hosts, plant compartments, geographic locations, and environmental factors (44, 45) are promising  
105 for designing experiments to minimize the search space, or necessary sample numbers, to identify  
106 candidate taxa for synthetic communities. For instance, factors that explain great variation in  
107 microbial community composition, but that are outside the control of management, can be treated  
108 as blocks in experimental designs, so that host- or compartment-specific effects on the microbial  
109 community can be searched to identify the most desirable candidate taxa.

110 In our current study, building on previously described agricultural experiments in grafted  
111 tomato systems (46, 47), we characterized the root-associated fungal (RAF) communities and  
112 implemented an interaction-based approach to select potential candidate fungi that are predictive of  
113 tomato yield and/or that are in significant association with other fungal taxa. The new phenotype-  
114 OTU network analysis (PhONA) is a method for network-visualization and a framework to support  
115 the selection of candidate taxa and to integrate system traits (such as host yield) in microbe-microbe  
116 association networks. PhONA first identifies OTUs predictive of phenotype using lasso regression,  
117 then uses the predicted OTUs from lasso regression to build a reduced GLM. PhONA then

118 combines the GLM results indicating positive or negative associations of the predicted OTUs with  
119 the host phenotype as well as with other OTUs in a network model (Fig. 1). Due to the large  
120 number of OTUs compared to the sample size, lasso regression was used because it is suited for  
121 minimizing overfitting when applied with a relatively small sample size (48) and has been  
122 implemented in microbiome studies (49, 50).

123 Phenotype-based selection of microbial consortia is promising as an effective approach to  
124 select representative microbial taxa and could support the design of microbiome-based products.  
125 Changes in abundance (51), successive selection over multiple generations (3), or analyses of binary  
126 host-microbe relationships (52) are some of the recent phenotype-based applications to select  
127 candidate taxa for biological applications. Despite the importance of biological test-based  
128 approaches, difficulty in culturing all the microbes makes computational approaches instrumental to  
129 define microbe-microbe and host-microbiome associations, and to identify the biological and  
130 ecological key taxa. Tools to describe the community structures based on the co-occurrence matrix  
131 or covariance structures (53, 54) are more common, whereas tools to integrate host phenotype or  
132 environmental factors are at an earlier phase of development. Relatively small sample sizes  
133 combined with large number of features may limit applications of the recent graph-based  
134 approaches. Such methods allow measurement of direct associations via conditional dependence  
135 structures and offer options to include environmental and phenotypic information in the model (55).  
136 CoNet (56) and Flashweave (55) allow representation of the phenotype or an environmental variable  
137 as an extra node or a column in the adjacency matrix, and the same statistical method can be applied  
138 to define the associations among microbes and between microbes and phenotypes (taxa and  
139 metadata). PhONA is generic as it allows the user to select data structure-specific models for  
140 microbe-microbe and microbe-phenotype associations.

141 In the current case study, we used lasso regression to identify the subset of OTUs and then  
142 fitted them using GLMs to predict OTU-phenotype associations, whereas the OTU-OTU  
143 associations were defined using SparCC. Additionally, we contrasted the RAF community's diversity  
144 and interactions among the rootstocks and the controls, for endosphere and rhizosphere  
145 compartments. Based on our yield data, rootstock vigor, and previous studies of microbial  
146 interactions (25), we expected a greater number of fungal OTUs and of microbial associations for  
147 more productive rootstocks. Moreover, in our previous studies of bacterial communities in the  
148 tomato rhizobiome, we observed compartment-specific (endosphere vs rhizosphere) effects of  
149 grafting and rootstocks on bacterial community composition and diversity (47), and expected similar

150 effects on RAF diversity and composition. All the code and vignettes for PhONA are available at  
151 <https://ravinpoudel.github.io/PhONA/index.html> and archived at zenodo (DOI:  
152 10.5281/zenodo.6600986).

153

154

## 155 **METHODS**

156 **Experimental Plots, Rootstocks, and Study Sites.** We studied grafted tomato plants in  
157 high tunnels in an experimental design similar to that described by Poudel et al. (47). Tomato plants  
158 were grafted following a tube-grafting protocol described in Meyer et al. (46). Our study included  
159 three rootstocks (BHN589; RST-04-106, and Maxifort) in four graft treatments: 1) nongrafted  
160 BHN589 plants; 2) selfgrafted BHN589 plants (plants grafted to their own rootstock); 3) BHN589  
161 grafted to RST-04-106; and 4) BHN589 grafted to Maxifort. We chose BHN589 as scion primarily  
162 based on its popularity due to high yield and high-quality fruit with a long shelf life. For rootstocks,  
163 we selected Maxifort because it is a productive and popular rootstock, and RST-04-106 as a new  
164 rootstock variety based on tomato breeders' recommendations.

165 Our study included two sites: Olathe Horticulture Research and Extension Center (OHREC)  
166 and Common Harvest Farm, a farm managed by a collaborating farmer. For more information  
167 about the sites, see Table S1. At each study site, the four graft treatments were assigned to four plots  
168 per block in a randomized complete block design. Each plot consisted of 5-8 plants, and one middle  
169 plant per plot was sampled during the peak growth stage. There were six blocks at OHREC, and  
170 four blocks at Common Harvest Farm, such that for each year, each graft treatment was replicated  
171 10 times. The experiment was repeated for two years (2014 and 2015) with a similar design, with the  
172 blocks and rootstocks randomly and independently assigned in each year.

173 **Sample Preparation, DNA Extraction, and Amplicon Generation.** To compare the  
174 fungal communities, we selected a center plant from each plot and carefully dug the whole plant out  
175 such that the majority of the roots remained intact. Endosphere and rhizosphere samples were  
176 prepared as previously described (47) and the total genomic DNA was extracted using a DNA  
177 extraction kit (MoBio UltraClean Soil DNA Isolation Kit; MoBio, Carlsbad, CA, USA) as per  
178 manufacturer's protocol, with slight modification during the homogenization step (47). To recover  
179 high genetic diversity, we opted for the two-step PCR approach. The primary PCR amplicons were  
180 generated in 50  $\mu$ L reactions under the following conditions: 1  $\mu$ M forward and reverse primers, 10  
181 ng template DNA, 200  $\mu$ M of each dioxynucleotide, 1.5 mM  $MgCl_2$ , 10  $\mu$ L 5x Phusion Green HF

182 buffer (Finnzymes, Vantaa, Finland), 24.5  $\mu$ L molecular biology grade water, and 1-unit (0.5  $\mu$ L)  
183 Phusion Hot Start II DNA Polymerase (Finnzymes, Vantaa, Finland). PCR cycle parameters  
184 consisted of a 98° C initial denaturing step for 30 seconds, followed by 30 cycles at 98° C for 10  
185 seconds, 57° C annealing temperature for 30 seconds, and 72° C extension step for 30 seconds,  
186 followed by a final extension step at 72° C for 10 minutes. All samples were PCR-amplified in  
187 triplicate to minimize stochasticity, pooled, and cleaned using Diffinity RapidTip (Diffinity  
188 Genomics, West Chester, PA, USA). In this PCR, we amplified the entire ITS region of fungal  
189 rRNA genes using primers ITS1F-CTTGGTCATTTAGAGGAAGTAA and ITS4-  
190 TCCTCCGCTTATTGATATGC (e.g. 57). The average amplicon length of the ITS region in fungi  
191 is about 600 bp and could not reliably be fully covered with the Illumina MiSeq platform (v.3-  
192 chemistry) in a single read. Thus, in the following nested PCR, only ITS2 of the ITS region was  
193 amplified using fITS7-ITS4 primers (58) incorporating unique Molecular Identifier Tags (MIDs) at  
194 the 5' end of the reverse primer (ITS4). For the nested PCR, we used similar reagents and PCR  
195 conditions as in the primary PCR, with some modifications: the number of PCR cycles was reduced  
196 to ten, total reaction volume was reduced to 25  $\mu$ L, and 5  $\mu$ L of cleaned PCR product from the first  
197 PCR amplification was used as the DNA template. The nested PCR was also run in triplicate, pooled  
198 by experimental unit, and cleaned with an Agencourt AmPure cleanup kit using a SPRIplate 96-ring  
199 magnet (Beckman Coulter, Beverly, MA, USA) as per the manufacturer's protocol. Then, 200 ng of  
200 cleaned, barcoded amplicons were combined per experimental unit, and the final pool was cleaned  
201 again using an Agencourt AmPure cleanup kit as above. Illumina MiSeq adaptors were ligated to the  
202 library and paired-end sequenced on a MiSeq Personal Sequencing System (Illumina, San Diego, CA,  
203 USA) using MiSeq Reagent Kit V3 with 600 cycles. The endosphere and the rhizosphere amplicon  
204 libraries were sequenced separately in two runs. Adaptor ligation and sequencing were performed at  
205 the Integrated Genomics Facility at Kansas State University. All sequence data generated in this  
206 study were deposited in the NCBI Sequence Read Archive depository (BioProject:.....).

207 **Bioinformatics and OTU Designation.** The sequence library of fastq files was curated  
208 using the MOTHUR pipeline (Version 1.33.3; (59)) following steps modified from the MiSeq  
209 Standard Operating Protocol (SOP; [www.mothur.org/wiki/MiSeq\\_SOP](http://www.mothur.org/wiki/MiSeq_SOP)). Briefly, the forward and  
210 the reverse reads were assembled into contigs using the default alignment algorithm. Any sequences  
211 shorter than 250 base pairs or containing an ambiguous base call or more than eight homopolymers  
212 or missing MIDs were removed from the library. Barcoded sequences were assigned to experimental  
213 units, and the data for endosphere and rhizosphere libraries were merged and processed together for



214 the remaining steps in the MOTHUR pipeline. The pairwise distance matrix based on the filtered  
215 sequences was created and sequence data clustered into OTUs at 97% sequence similarity using the  
216 nearest neighbor joining algorithm. The clustered OTUs were assigned to a putative taxonomic  
217 identity using a Bayesian classifier (60) referencing the UNITE plus INSD non-redundant ITS  
218 database (61). To minimize the bias resulting from unequal sequence counts per sample, samples  
219 were rarified to the lowest sequence count among the samples (6,777). The final curated OTU  
220 database included 1,084,281 total sequences representing 16,151 fungal OTUs, including singletons  
221 (5,376).

222 **Statistical analyses.** We evaluated the network of associations among fungal OTUs with  
223 network models to better understand the community composition and the interactions therein. The  
224 observed OTU database was divided into eight subsets, each combination of the four rootstocks and  
225 two compartments (endosphere and rhizosphere), such that we constructed eight networks in total.  
226 In our network models, a node represents an OTU and a link exists between a pair of OTUs if there  
227 is evidence ( $p < 0.05$ ) that their frequencies are correlated (positively or negatively) across samples.  
228 Reducing false associations due to compositional bias in network modeling of microbiome data is  
229 important for clearer interpretation (62). Thus, we used a Sparse Correlations for Compositional  
230 data (SparCC) method to evaluate the pairwise associations (62), designed to minimize the  
231 compositional bias effect due to normalization. In our analyses, associations were defined in 20  
232 iterations, and the significance of a pairwise association was determined from 100 bootstrapped  
233 datasets. Once the matrix defining all the pairwise associations was derived, we selected only those  
234 OTUs for which the absolute value of at least one association was greater than 0.5 (and  $p < 0.05$ ) in  
235 the network analyses for each of the rootstock genotypes.

236 To identify the OTUs associated with tomato yield in each rootstock, a regression-based  
237 model was fitted to the observed data. Marketable tomato yield data reported by Meyer et al. (46)  
238 was the response variable and fungal OTUs were potential predictors. We used the caret package  
239 (63) to evaluate the lasso regression and selected OTUs using varImp functions. Lasso regression  
240 used an L1 regularization approach to shrink the less important variables' coefficients to zero and to  
241 reduce the number of variables in the model. In lasso regression, lambda determines the penalty of  
242 regularization, and its value can range from zero to infinity; when it is zero, the results are similar to  
243 the least square lines. A grid-based approach was used to tune the lambda parameter using repeated  
244 (ITERS=500) 5-fold cross-validation and the value of lambda with lowest variance was selected.  
245 Only the OTUs with non-zero coefficients were selected, based on the lasso-regression model, to

246 build the reduced GLM model, and the association type of each OTU with phenotype was  
247 estimated. Given the small sample size, we did not evaluate the model performance by splitting the  
248 data into training and test cases, although this would be a valuable step in future studies with larger  
249 sample sizes. PhONA then integrates the results from the GLM model for yield with the OTU-  
250 OTU association network. We plotted the resulting network using the igraph package (54) in R. To  
251 evaluate the role of nodes in the network, we placed each node in one of four categories –  
252 peripherals, module hubs, network hubs, and connectors – based on the within-module degree and  
253 among-module connectivity (24, 55). Role analyses were only used the presence or absence of links  
254 in the network and do not account for the link types (i.e. positive or negative associations).

255 To evaluate the effects of rootstocks on fungal diversity, Shannon entropy and species  
256 richness were evaluated using the vegan package (64) wrapped by the phyloseq package (65) in R  
257 (66). Differences in diversity across the rootstocks were compared using a mixed model ANOVA in  
258 the lme4 package in R (67). Study site and sampling year were treated as random factors, blocked by  
259 study sites, whereas the rootstock and compartments were treated as fixed factors. Changes in fungal  
260 community composition across the samples were estimated based on a Bray-Curtis dissimilarity  
261 distance matrix and visualized in non-metric multidimensional scaling (NMDS) plots. The  
262 contribution of factors to the observed variation in fungal composition was estimated in a  
263 permutational multivariate analysis of variance (PERMANOVA, using 1000 permutations) using the  
264 adonis function in the vegan package (64). To identify OTUs that were sensitive to the rootstock  
265 treatments, the observed frequency (proportion) of each OTU was evaluated by fitting a generalized  
266 linear model (GLM) with negative binomial distribution, to identify depleted or enriched OTUs  
267 (Differentially Abundant OTUs – DAOTUs). Likelihood ratio tests and contrast analyses (between  
268 the hybrid rootstock and controls) were performed for the fitted GLM to identify the DAOTUs. We  
269 used OTU frequencies from selfgrafts and nongrafts as controls, in comparisons with other  
270 rootstocks, using contrasts. All tests were adjusted to control the false discovery rate (FDR,  $p <$   
271 0.01) using the Benjamini-Hochberg method (68). A differential abundance test was performed  
272 within the controls (selfgraft vs. nongraft) to identify the OTUs responsive to the grafting  
273 procedure, itself.

## 274 RESULTS

275 **RAF in the Grafted Tomato System.** Once rare OTUs (<10 sequence counts, which  
276 accounted for more than 90% of the observed OTUs) were removed, the community consisted of  
277 1586 OTUs and 1,063,017 sequences. Of these sequences, 4.8% remained unclassified at the phylum  
278 level (Fig. S1). The classified sequences represented Ascomycota (52.5%), Basidiomycota (25.6%),  
279 Zygomycota (11.5%), Chytridiomycota (3.6%), Glomeromycota (1.7%), and Rozellomycota (0.07%)  
280 (Fig. 1). At the class level, Pezizomycetes, Agaricomycetes, and Dothideomycetes were the most  
281 abundant across all the rootstocks. At the order level, the communities were dominated by Pezizales,  
282 Pleosporales, Cantharellales, Mortierellales, and Hypocreales. Analyses at the family level revealed  
283 that Pyronemataceae, Mortierellaceae, Ceratobasidiaceae, and Pleosporaceae were the most common  
284 taxa overall. At the genus level, *Mortierella*, *Thanatephorus*, and *Alternaria* were the most abundant  
285 genera.

286 **Effects of Grafting and Rootstock on  $\alpha$ -Diversity.** There was strong evidence for a  
287 rootstock effect on OTU richness ( $F_{1,3} = 8.6$ ,  $p < 0.001$ ) and Shannon entropy ( $F_{1,3} = 3.2$ ,  $p = 0.02$ )  
288 for tomato RAF communities. Mean species richness was higher in both the endosphere ( $p = 0.01$ )  
289 and rhizosphere ( $p = 0.001$ ) of one of the hybrid rootstocks, Maxifort, compared to the nongrafted  
290 control. Shannon entropy followed trends similar to richness with a higher estimate for Maxifort;  
291 however, there was only evidence for higher Shannon entropy in Maxifort for the rhizosphere ( $p =$   
292  $0.004$ ), but not for the endosphere ( $p = 0.6$ ) (Fig. 2). Both species richness and Shannon entropy  
293 were higher ( $p < 0.001$ ) in the rhizosphere than in the endosphere across all the rootstock genotypes  
294 (Fig. S2).

295 **Effects of Grafting and Rootstock on RAF Composition.** Based on previous studies of  
296 the plant genotype effect on the rhizobiome (47), we expected a significant rootstock effect on  
297 community composition. Rootstock explained 2% of the variation in the RAF community  
298 composition (PERMANOVA;  $p < 0.01$ ), whereas compartment, study site, and year explained a  
299 greater proportion of the variation than rootstock (Fig. S3 and Table S2). Endosphere-rhizosphere  
300 compartments accounted for 8.92% of the variation. Study site and interannual variation explained  
301 8.34% and 5.38% of the total variation, respectively (Table S2).

302 **Comparison of DAOTUs.** The analysis of differential abundance found effects of  
303 rootstock genotype at the individual OTU level. While analyses of alpha diversity indicated higher  
304 diversity in the rhizosphere than in the endosphere, we observed the opposite in the analysis of  
305 DAOTUs, with nearly twice as many DAOTUs in the endosphere ( $n = 146$  i.e. 9.2% of the total

306 OTUs) compared to the rhizosphere ( $n = 76$  i.e. 4.8% of total OTUs) (Figs. 2 and S4). Comparison  
307 across rootstocks indicated a greater number of DAOTUs in Maxifort ( $n = 80$ ) than in RST-04-106  
308 ( $n = 66$ ) and the selfgraft control ( $n = 49$ ). Compared to the hybrid rootstocks, the number of  
309 depleted taxa was greater in the selfgraft control ( $n = 28$ ). Among the enriched OTUs in Maxifort,  
310 27 OTUs belonged to Basidiomycota, 20 to Ascomycota, and 11 to Glomeromycota, whereas four  
311 basidiomycete, three ascomycete, and one zygomycete OTUs were depleted in Maxifort. In RST-04-  
312 106, enriched taxa included 22 OTUs in Basidiomycota, 20 OTUs in Ascomycota and five OTUs in  
313 Glomeromycota, whereas the depleted OTUs included six in Zygomycota. Comparing the self- and  
314 nongraft controls, nine OTUs in Ascomycota, three OTUs in Basidiomycota, and four OTUs in  
315 Zygomycota were enriched in the selfgraft treatment, whereas 12 OTUs in Basidiomycota, seven  
316 OTUs in Ascomycota, four OTUs in Zygomycota, and three OTUs in Glomeromycota were  
317 depleted in the selfgraft treatment.

318 **Network Analysis/ General Network Structures.** Fungal community complexity,  
319 defined in terms of mean node degree and community structures/motifs, varied among the  
320 rootstocks in both the endosphere and the rhizosphere, with a greater mean node degree in one of  
321 the hybrid rootstocks, Maxifort, compared to both controls and RST-04-106 (Figs. 3, S5, S6, and  
322 Table S3). Complexity was higher in the rhizosphere than in the endosphere compartment (Figs. 3,  
323 S5, S6, and Table S3). In addition to the total number of links, the link type (either positive or  
324 negative) differed among the rootstocks in both compartments (Table S3), with a higher ratio of  
325 negative to positive links in Maxifort in both the endosphere and the rhizosphere compartments.  
326 Rhizosphere fungal communities had a higher ratio of negative to positive links than those in the  
327 endosphere, for all rootstocks. Although we observed rootstock-specific or compartment-specific  
328 effects on the node degree and ratio of negative to positive links, the number of modules defined  
329 using a simulated annealing (SA) algorithm were similar in both the endosphere and rhizosphere  
330 compartments and across the rootstocks (Table S3). Our analyses of node types divided the  
331 observed nodes in the association-network into four categories: peripherals, module hubs, network  
332 hubs, and connectors. More taxa in the rhizosphere were identified as key nodes than in the  
333 endosphere, and key nodes were more common in the hybrid rootstocks than in the non- and  
334 selfgrafted controls (Figs. 4 and 5).

335 **Lasso regression, GLM, and PhONA.** Using lasso regression and GLM models, we  
336 identified the OTUs predictive of tomato yield in each compartment in each rootstock. The number  
337 of predictive OTUs identified by the varImp function was about the same across the rootstock

338 treatments in both the compartments. However, not all the predicted OTUs were associated with  
339 other OTUs in the network models. The Maxifort rhizosphere had the highest number of OTUs  
340 (10) associated with other OTUs in the network models. Only a subset of the entire microbiome was  
341 predictive of the yield, among which only a few microbes were associated with other microbes in the  
342 network models.

## 343 **DISCUSSION**

344 This study demonstrated the effect of rootstocks on RAF community composition and structure.  
345 General diversity-based analyses indicated a rootstock effect. The most productive hybrid rootstock,  
346 Maxifort, supported higher fungal richness and Shannon entropy, as well as a greater number of  
347 DAOTUs than the controls, consistent with the expectation that higher diversity and a higher  
348 number of responsive taxa (DAOTUs) would be associated with a more productive genotype. Also  
349 consistent with our expectations, we observed higher microbial diversity and fewer responsive taxa  
350 (DAOTUs) in the rhizosphere compared to the endosphere. The integrated host phenotype and  
351 OTU network in the PhONA identified potential candidate taxa for each rootstock, and community  
352 structures in the endosphere and rhizosphere compartments. The general network analysis found  
353 more interactions and more complex network structures in fungal communities associated with  
354 Maxifort, consistent with our expectation that a more productive rootstock would have greater  
355 community complexity. Community complexity, when defined in terms of mean node degree,  
356 differed between the root compartments: the endosphere community was less complex than the  
357 rhizosphere community in all the rootstocks. Overall, our study i) showed that rootstocks and  
358 grafting are significant drivers of RAF community composition, diversity and structure, and ii)  
359 introduced and illustrated the use of PhONA as an analytical framework to select potential  
360 candidates for microbiome-based agriculture. Potential candidates are those taxa that were directly  
361 predictive of higher yield (taxa with direct positive links with the yield node in the network), taxa  
362 that have positive associations with taxa positively associated with yield, and/or taxa that have  
363 negative associations with taxa negatively associated with yield. There is the potential to consider  
364 taxa multiple steps removed from the yield response, with the understanding that uncertainty about  
365 the link to yield increases the more steps the taxon is from the yield node. From a practical  
366 standpoint, our results indicate the potential for using plant genotypes and agricultural practices to  
367 modulate plant-associated microbial communities, and the potential for the PhONA framework to  
368 improve identification of candidate taxa to support microbiome-based crop production.

369 In contrast to network models that portray only microbe-microbe interactions, PhONA  
370 integrates the results of GLM models of microbe association with phenotypic traits to support  
371 inference about candidate taxa and predictive microbiome analyses. Thus, candidate taxa can be  
372 selected not only because they have a direct association with the host response variable(s), but also  
373 because they are indirectly associated with the host response variable through their associations with  
374 community members that have direct associations with host traits. For instance, a node that has a  
375 positive association with the system phenotype node (in our case, yield) might have negative or  
376 positive associations with other OTUs. Such OTUs with indirect positive associations with the  
377 desired phenotype might also be included in biofertilizer consortia. Using a PhONA, a rational  
378 consortium can be selected based on the phenotype of interest. Applying PhONA for disease or  
379 pathogen resistance phenotypes could be useful for designing rational biocontrol consortia. We also  
380 observed some OTUs with direct negative associations with the yield node. Efforts to control  
381 negatively associated taxa, as well as the taxa that have positive associations with these taxa, might  
382 contribute to maximizing yield. Although we did not observe any disease symptoms in our  
383 experiments, OTUs negatively associated with the yield node might represent a case of  
384 asymptomatic negative microbial effects on yield. Efforts to explore negatively associated OTUs  
385 might provide opportunities to minimize asymptomatic yield loss in crops.

386 The main goal of PhONA is to provide a systems framework to generate hypotheses about  
387 the role of microbiome components in host function and performance, and to support the potential  
388 for mechanistic/predictive models to better understand host-microbiome interactions. *In planta*  
389 experiments with fungal cultures are essential to test the hypotheses generated by these models, to  
390 help to differentiate between associations that are based on consistent biological interactions and not  
391 simply based on shared (or opposing) environmental niche preferences. It is important to be  
392 cautious in attributing biological interactions to the key structures in network attributes because the  
393 links in the PhONA may or may not depict biological interactions. That is, many links may represent  
394 only correlative relationships and not causal ones (28). For instance, the hub node in the network is  
395 often regarded as a key node, but the high number of links with the hub node in the association  
396 network could be due to shared niches, biological interactions, or a mixture thereof. If the  
397 associations are mostly due to shared niches, removing such a hub node will have a more limited  
398 effect, whereas removal of a hub node involved in many biological interactions could lead to  
399 significant effects on the microbial community.

400           RAF community composition, diversity, and interactions differed between the endosphere  
401 and rhizosphere compartments. Although the endosphere and the rhizosphere are physically  
402 adjacent, they are distinct in community composition and diversity. Compartment specificity in  
403 community composition and diversity has been reported for other plant species, in both natural and  
404 agricultural settings (31, 69, 70). Usually, bulk soil is considered a source of microbial communities, a  
405 subset of which is selected for in the rhizosphere (31, 71), mainly as a function of root exudates and  
406 rhizodeposits (43, 72-75). Selection of the rhizosphere microbiome could be specific (*e.g.*,  
407 antagonistic to plant pathogens) (76, 77) or more general with less influence of host genotype. In  
408 comparison, the endosphere of host plants often supports lower microbial diversity compared to the  
409 rhizosphere (70, 71). Host tissues and defense systems act as biotic filters (2). As a result, the  
410 microbiome is more specialized in the endosphere than in the rhizosphere. RAF compartment  
411 specificity may also be an important consideration for microbe-based disease management strategies  
412 – especially for the management of pathogens or pests that are compartment specific, such as  
413 endoparasites and ectoparasites.

414           RAF community composition and diversity also differed among the rootstock genotypes.  
415 Plant genotypes can structure root-associated fungal communities (31, 70, 78). The commercial  
416 rootstocks in our study have been bred to provide resistance against specific soilborne pathogens  
417 and pests. Small host genotypic differences could alter the physiological and immunological  
418 responses in the root systems, thereby selecting genotype-specific RAF communities (79). For  
419 example, some root exudates and metabolites could be specific to a plant genotype (80-82) and  
420 provide specific control of microbial communities (83-85). In some cases, the host genotype effect  
421 can be directly attributed to root anatomy (77, 85, 86). Efficient root types and architectures are  
422 desired agronomic traits to cope with biotic and abiotic stresses (87), and root systems vary among  
423 and within plant species (86). Moreover, the effect of plant genotypes on microbial communities in  
424 the root system may be linked to the flow of nutrients between the aboveground-scion and  
425 belowground-rootstocks, where vigorous rootstock genotypes could drive greater resources to the  
426 microbial communities by supporting larger scion biomass. In such a positive nutrient feedback  
427 between the scion and rootstock, rootstock genotype appears to be a more critical driver than the  
428 scion genotype (88). Rootstock genotypes supporting higher yield and biomass may support higher  
429 microbial diversity by excreting a greater volume of photosynthates as root exudates and  
430 metabolites. Although we did not evaluate root exudates, and used the same scion across the study,  
431 our study is consistent with a role of higher yield and biomass (as for the Maxifort rootstock) being

432 associated with higher fungal diversity. Additionally, we observed an effect of rootstock on the RAF  
433 community composition. Collectively, the results support our expectations of rootstock-specific  
434 control of the RAF community.

435 Our definition of complexity is based on interactions in networks, using a definition similar  
436 to that used in other microbiome network analyses (25, 34, 89). However, a greater number of  
437 interactions and complex network structures/motifs would tend to be observed whenever more  
438 nodes exist in these association networks, an inherent relationship not always considered in studies  
439 of complexity in microbiomes. The higher number of OTUs associated with Maxifort would tend  
440 to result in higher complexity compared to rootstocks with fewer OTUs. Another potential measure  
441 of complexity is network density, the proportion of links observed in a network relative to the total  
442 number of possible links. For all the rootstocks we studied, network density was similar (0.04) in  
443 both compartments, indicating similar community complexity. Statistical methods comparable to  
444 rarefaction, designed to equalize the number of nodes across networks or methods to balance OTU  
445 richness for sampling efforts (90), will be a valuable future effort for understanding how network  
446 complexity responds to treatments and for making comparisons across studies. In addition, methods  
447 to optimize and automate the selection of association thresholds to define the pairwise relationships  
448 in a microbiome network is a gap and opportunity for improving microbiome network analyses. For  
449 graphics in the figures in this analysis, we selected a level of association such that an interpretable  
450 number of OTUs were depicted for visual consideration. Studies directly applied to identify  
451 potential microbial assemblages for agricultural applications could benefit from exploring results for  
452 a range of thresholds.

453 Our study indicates the rootstock-genotype specific effect on RAF diversity, composition,  
454 and interactions, and also demonstrates integration of system phenotypes such as plant yield in a  
455 network-based model to support selection of candidate taxa for biological use. However, in  
456 sequence-based studies such as ours, the biological and functional significance of the candidate  
457 OTUs remains unknown. Follow-up experiments with fungal cultures will be necessary to determine  
458 the biological roles of the candidate OTUs, and to differentiate causal associations from correlations  
459 based on niche preference. Similarly, further development of PhONA to incorporate temporal  
460 microbiome data and Bayesian learning and inference methodologies (91, 92) has the potential to  
461 support causal inference, including understanding of directionality in microbiome networks.  
462 PhONA utilizes a lasso regression and GLM to link OTUs with a system phenotype, although many  
463 other models such as random forest and other machine learning approaches (93) could also be



464 employed. Given the nature of microbiome data, having a high number of features ( $p$ ) and relatively  
465 small number of samples ( $n$ ), other models to address the  $n \times p$  problem can improve PhONA  
466 predictions. Rather than pure prediction, our methods aim to find the key predictors and use them  
467 in the GLM model for evaluating associations with the yield response. PhONA focused on finding  
468 the attributable predictors/OTUs that are key to biological interventions, which are missed in  
469 approaches that are focused purely on prediction (24). Smaller sample size was a limitation in our  
470 current study, reflecting the challenge of processing a large number of plant replicates, and we did  
471 not validate the results from our model by splitting data into training and test sets. A rigorous model  
472 validation step would improve the accuracy of PhONA. As lab-based technologies and  
473 computational resources become less expensive, studies with large sample sizes are becoming more  
474 practical and, when combined with an analytical framework like PhONA, microbial community  
475 analyses can go beyond simple analyses of diversity to help make microbiome-based agriculture a  
476 reality.

477

#### 478 **Acknowledgements**

479 We appreciate support from the Ceres Trust, USDA NCR SARE Research and Education Grant  
480 LNC13-355, Foundation for Food and Agriculture Research Grant  
481 FF-NIA19-0000000050, the Kansas Agricultural Experiment Station, the National Institute for  
482 Mathematical and Biological Synthesis (NIMBioS), and the University of Florida. We thank  
483 members of the Garrett lab for their comments on an early version of the manuscript. R.P., K.A.G.,  
484 A.J., M.M.K., and C.L.R. designed the study. R.P. and L.G.M. collected and processed the samples.  
485 R.P. analyzed and interpreted the data. R.P., K.A.G., and A.J. wrote the manuscript. R.P., K.A.G.,  
486 A.J., M.M.K., C.L.R., and L.G.M. revised the manuscript. All authors read and approved the final  
487 manuscript.

488 **FIG 1** The Phenotype-OTU network analysis (PhONA) combines (A) an OTU-OTU association  
489 network with (B) the nodes selected based on predictive model for their association with a host  
490 phenotype variable such as yield, to create (C) a PhONA.

491  
492 **FIG 2** Enriched and depleted OTUs across tomato rootstock genotype combinations (nongraft  
493 BHN589, selfgraft BHN589, and BHN589 grafted on two hybrid rootstocks (RST-04-106 and  
494 Maxifort)) evaluated for the rhizosphere (A) and the endosphere (B), using OTU counts from  
495 selfgrafts and nongrafts as controls. All the tests were adjusted to control the false discovery rate  
496 (FDR,  $p < 0.01$ ) using the Benjamini-Hochberg method. Each point represents an OTU labeled at  
497 the genus level and colored based on phylum, and the position along the x-axis represents the  
498 abundance fold-change contrast with controls (except for the selfgraft vs. nongraft comparison,  
499 where the nongraft treatment was used as a control for the contrast).

500  
501 **FIG 3** Phenotype-OTU network analysis (PhONA) of endosphere fungal taxa for BHN589 grafted  
502 on Maxifort. Node color indicates the phylum, except that the yellow-color node represents yield  
503 associated with the rootstock. Nodes connected to the rootstock yield node with black links are taxa  
504 that were predictive of rootstock yield, where dotted and solid lines indicate negative and positive  
505 associations with the yield node, respectively. Red and blue links represent negative and positive  
506 associations, respectively, between OTUs. Nodes are labeled with the finest-resolution taxonomic  
507 categorization available.

508  
509 **FIG 4** Partitioning of endosphere fungal OTUs according to their network roles. Nodes were  
510 divided into four categories based on within-module degree and among-module connectivity. The  
511 blue dashed line represents a threshold value (0.62) for among-module connectivity, and the red  
512 dashed line represents a threshold value (2.5) for within-module degree. Nodes were categorized as  
513 peripherals, connectors, module hubs, and network hubs. Node color indicates rootstock treatment  
514 (nongraft BHN589, selfgraft BHN589, and BHN589 grafted on two hybrid rootstocks (RST-04-106  
515 and Maxifort)).

516  
517 **FIG 5** Partitioning of rhizosphere fungal OTUs according to their network roles. Nodes were  
518 divided into four categories based on within-module degree and among-module connectivity. The  
519 blue dashed line represents a threshold value (0.62) for among-module connectivity, and the red  
520 dashed line represents a threshold value (2.5) for within-module degree. Nodes were categorized as  
521 peripherals, connectors, module hubs, and network hubs. Node color indicates rootstock treatment  
522 (nongraft BHN589, selfgraft BHN589, and BHN589 grafted on two hybrid rootstocks (RST-04-106  
523 and Maxifort)).

524  
525 **FIG S1** Relative abundance of endosphere and rhizosphere fungi at the phylum level recovered  
526 from four tomato rootstock treatments: nongraft BHN589, selfgraft BHN589, and BHN589 grafted  
527 on two hybrid rootstocks (RST-04-106 and Maxifort). Each individual bar represents a rootstock  
528 treatment, and the colored area within the bar represents the relative abundance of the  
529 corresponding phylum.

530  
531 **FIG S2** Comparison of overall fungal diversity (A) and richness (B) associated with tomato  
532 rootstock genotypes and controls, evaluated in the endosphere and rhizosphere. The plot is divided  
533 by the four tomato rootstock treatments: nongraft BHN589, selfgraft BHN589, and BHN589  
534 grafted on two hybrid rootstocks (RST-04-106 and Maxifort). Shannon entropy and species richness,  
535 measures of community diversity, were both higher for Maxifort ( $p < 0.005$ ) compared to the self-

536 graft and RST-04-106 in the rhizosphere, while there was not evidence for a difference in Shannon  
537 entropy in the endosphere ( $p = 0.634$ ). Treatment means were separated using the "diffsmeans"  
538 function as specified in the lmerTest package in R. Tests for boxplots sharing a letter or letter case  
539 type had  $p > 0.05$ .

540  
541 **FIG S3** Non-metric multidimensional scaling (NMDS) ordination plot of samples labeled by tomato  
542 rootstock (nongraft BHN589, selfgraft BHN589, and BHN589 grafted on two hybrid rootstocks  
543 (RST-04-106 and Maxifort)), compartment (endosphere or rhizosphere), and study site, based on the  
544 Bray-Curtis dissimilarity distance matrix of fungal OTUs. Color indicates rootstock treatment, shape  
545 indicates study site, and size indicates compartment. Ellipses surrounding the samples indicate the  
546 95% CI of the endosphere and rhizosphere sample centroids.

547  
548 **FIG S4** Number of DAOTUs in a contrast analysis, evaluated for the endosphere and rhizosphere  
549 compartments for four tomato rootstock treatments: nongraft and selfgraft BHN589, and BHN589  
550 grafted on two hybrid rootstocks (Maxifort and RST-04-106). The green color in each bar represents  
551 the number of enriched taxa, and the red color represents the number of depleted taxa. The number  
552 of differentially changed taxa was greater for the endosphere than for the rhizosphere. Among the  
553 contrast pairs, hybrid rootstocks had a greater number of enriched taxa compared to depleted taxa.  
554 However, the number of depleted taxa was higher compared to enriched taxa in the controls.  
555 Among the treatments, Maxifort had the highest number of DAOTUs in both compartments.

556  
557 **FIG S5** Phenotype-OTU network analysis (PhONA) of endosphere fungal taxa for tomato  
558 rootstock treatments: (A) nongraft and (B) selfgraft BHN589, and (C) BHN589 grafted on RST-04-  
559 106. Node color indicates the phylum, except that the yellow-color node represents yield associated  
560 with the rootstock. Nodes connected to the rootstock yield node with black links are taxa that were  
561 predictive of rootstock yield, where dotted and solid lines indicate negative and positive associations  
562 with the yield node, respectively. Red and blue links represent negative and positive associations,  
563 respectively, between OTUs. Nodes are labeled with the finest-resolution taxonomic categorization  
564 available.

565  
566 **FIG S6** Phenotype-OTU network analysis (PhONA) of rhizosphere fungal taxa for tomato  
567 rootstock treatments: (A) nongraft and (B) selfgraft BHN589, and BHN589 grafted on two hybrid  
568 rootstocks ((C) RST-04-106 and (D) Maxifort). Node color indicates the phylum, except that the  
569 tomato-color node represents yield associated with the rootstock. Nodes connected to the rootstock  
570 yield node with black links are taxa that were predictive of rootstock yield, where dotted and solid  
571 lines indicate negative and positive associations with the yield node, respectively. Red and blue links  
572 represent negative and positive associations, respectively, between OTUs. Nodes are labeled with  
573 the finest-resolution taxonomic categorization available.

574  
575 **TABLE S1** Sites included in the study, their soil type, and geographic coordinates.

576  
577 **TABLE S2** Results of the multivariate permutational analysis of variance (PERMANOVA) for  
578 fungal taxon abundance data. Permutation was based on the Bray-Curtis distance matrix generated  
579 for root associated fungal communities at the OTU level from four tomato rootstock treatments:  
580 nongraft and selfgraft BHN589, and BHN589 grafted on two hybrid rootstocks (Maxifort and RST-  
581 04-106) (1000 permutations). P values  $< 0.05$  are in bold.

582

583 **TABLE S3** Network attributes and links observed in the fungal association networks for four  
584 tomato rootstock treatments: nongraft and selfgraft BHN589, and BHN589 grafted on two hybrid  
585 rootstocks (Maxifort and RST-04-106) in each of rhizosphere and endosphere compartments.  
586

## 587 REFERENCES

- 588
- 589 1. Berendsen RL, Pieterse CM, Bakker PA. 2012. The rhizosphere microbiome and plant  
590 health. *Trends Plant Sci* 17:478-86.
  - 591 2. Lebeis SL, Paredes SH, Lundberg DS, Breakfield N, Gehring J, McDonald M, Malfatti S,  
592 del Rio TG, Jones CD, Tringe SG, Dangl JL. 2015. Salicylic acid modulates colonization  
593 of the root microbiome by specific bacterial taxa. *Science* 349:860-864.
  - 594 3. Panke-Buisse K, Poole AC, Goodrich JK, Ley RE, Kao-Kniffin J. 2015. Selection on soil  
595 microbiomes reveals reproducible impacts on plant function. *ISME J* 9:980-9.
  - 596 4. Turnbaugh PJ, Hamady M, Yatsunenko T, Cantarel BL, Duncan A, Ley RE, Sogin ML,  
597 Jones WJ, Roe BA, Affourtit JP, Egholm M, Henrissat B, Heath AC, Knight R, Gordon  
598 JI. 2009. A core gut microbiome in obese and lean twins. *Nature* 457:480-4.
  - 599 5. Xue C, Penton CR, Shen Z, Zhang R, Huang Q, Li R, Ruan Y, Shen Q. 2015.  
600 Manipulating the banana rhizosphere microbiome for biological control of Panama  
601 disease. *Sci Rep* 5:11124.
  - 602 6. Gould AL, Zhang VV, Lamberti L, Jones EW, Obadia B, Korasidis N, Gavryushkin A,  
603 Carlson JM, Beerenwinkel N, Ludington WB. 2018. Microbiome interactions shape host  
604 fitness. *Proc Natl Acad Sci USA* 115:E11951-E11960.
  - 605 7. Zhou X, Wang JT, Wang WH, Tsui CK, Cai L. 2020. Changes in bacterial and fungal  
606 microbiomes associated with tomatoes of healthy and infected by *Fusarium oxysporum f.*  
607 *sp. lycopersici*. *Microb Ecol* doi:10.1007/s00248-020-01535-4.
  - 608 8. Kaur S, Egidi E, Qiu Z, Macdonald CA, Verma JP, Trivedi P, Wang J, Liu H, Singh BK.  
609 2022. Synthetic community improves crop performance and alters rhizosphere microbial  
610 communities. *J Sustain Agric* 1:118-131.
  - 611 9. Jin CW, Ye YQ, Zheng SJ. 2014. An underground tale: Contribution of microbial activity  
612 to plant iron acquisition via ecological processes. *Ann Bot* 113:7-18.
  - 613 10. Koide RT. 1991. Nutrient supply, nutrient demand and plant-response to mycorrhizal  
614 infection. *New Phytol* 117:365-386.
  - 615 11. Mishra PK, Bisht SC, Mishra S, Selvakumar G, Bisht JK, Gupta HS. 2012. Coinoculation  
616 of *rhizobium leguminosarum-pr1* with a cold tolerant *pseudomonas* sp. Improves iron  
617 acquisition, nutrient uptake and growth of field pea (*pisum sativum l.*). *J Plant Nutr*  
618 35:243-256.
  - 619 12. Mendes R, Kruijt M, de Bruijn I, Dekkers E, van der Voort M, Schneider JHM, Piceno  
620 YM, DeSantis TZ, Andersen GL, Bakker PAHM, Raaijmakers JM. 2011. Deciphering  
621 the rhizosphere microbiome for disease-suppressive bacteria. *Science* 332:1097-1100.
  - 622 13. Gaiero JR, McCall CA, Thompson KA, Day NJ, Best AS, Dunfield KE. 2013. Inside the  
623 root microbiome: Bacterial root endophytes and plant growth promotion. *Am J Bot*  
624 100:1738-50.
  - 625 14. Glick BR. 1995. The enhancement of plant-growth by free-living bacteria. *Can J*  
626 *Microbiol* 41:109-117.
  - 627 15. Conrath U. 2009. Priming of induced plant defense responses. *Plant Innate Immunity*  
628 51:361-395.

- 629 16. Pieterse CMJ, Zamioudis C, Berendsen RL, Weller DM, Van Wees SCM, Bakker  
630 PAHM. 2014. Induced systemic resistance by beneficial microbes. *Annu Rev*  
631 *Phytopathol* 52:347-375.
- 632 17. Marasco R, Rolli E, Ettoumi B, Vigani G, Mapelli F, Borin S, Abou-Hadid AF, El-  
633 Behairy UA, Sorlini C, Cherif A, Zocchi G, Daffonchio D. 2012. A drought resistance-  
634 promoting microbiome is selected by root system under desert farming. *PLoS One* 7(10):  
635 e48479.
- 636 18. Yang J, Kloepper JW, Ryu CM. 2009. Rhizosphere bacteria help plants tolerate abiotic  
637 stress. *Trends Plant Sci* 14:1-4.
- 638 19. Yuan ZL, Druzhinina IS, Labbe J, Redman R, Qin Y, Rodriguez R, Zhang CL, Tuskan  
639 GA, Lin FC. 2016. Specialized microbiome of a halophyte and its role in helping non-  
640 host plants to withstand salinity. *Sci Rep* 6:32467.
- 641 20. Mazzola M, Freilich S. 2017. Prospects for biological soilborne disease control:  
642 Application of indigenous versus synthetic microbiomes. *Phytopathology* 107:256-263.
- 643 21. Xu XM, Jeffries P, Pautasso M, Jeger MJ. 2011. Combined use of biocontrol agents to  
644 manage plant diseases in theory and practice. *Phytopathology* 101:1024-1031.
- 645 22. Shayanthan A, Ordoñez PAC, Oresnik IJ. 2022. The role of synthetic microbial  
646 communities (syncom) in sustainable agriculture. *Frontiers in Agronomy* 4.
- 647 23. de Souza RSC, Armanhi JSL, Arruda P. 2020. From microbiome to traits: Designing  
648 synthetic microbial communities for improved crop resiliency. *Front Plant Sci* 11:1179.
- 649 24. Agler MT, Ruhe J, Kroll S, Morhenn C, Kim ST, Weigel D, Kemen EM. 2016. Microbial  
650 hub taxa link host and abiotic factors to plant microbiome variation. *PLoS Biol* 14(1):  
651 e1002352.
- 652 25. Shi S, Nuccio EE, Shi ZJ, He Z, Zhou J, Firestone MK. 2016. The interconnected  
653 rhizosphere: High network complexity dominates rhizosphere assemblages. *Ecol Lett*  
654 19:926-36.
- 655 26. Ascunce MS, Shin K, Huguet-Tapia JC, Poudel R, Garrett KA, van Bruggen AHC, Goss  
656 EM. 2018. Penicillin trunk injection affects bacterial community structure in citrus trees.  
657 *Microb Ecol* 78:457-469.
- 658 27. Garrett KA, Alcalá-Briseno RI, Andersen KF, Buddenhagen CE, Choudhury RA, Fulton  
659 JC, Hernandez Nopsa JF, Poudel R, Xing Y. 2018. Network analysis: A systems  
660 framework to address grand challenges in plant pathology. *Annu Rev Phytopathol*  
661 56:559-580.
- 662 28. Poudel R, Jumpponen A, Schlatter DC, Paulitz TC, Gardener BBM, Kinkel LL, Garrett  
663 KA. 2016. Microbiome networks: A systems framework for identifying candidate  
664 microbial assemblages for disease management. *Phytopathology* 106:1083-1096.
- 665 29. Rottjers L, Faust K. 2018. From hairballs to hypotheses-biological insights from  
666 microbial networks. *Fems Microbiology Reviews* 42:761-780.
- 667 30. Wang Z, Bafadhel M, Haldar K, Spivak A, Mayhew D, Miller BE, Tal-Singer R,  
668 Johnston SL, Ramsheh MY, Barer MR, Brightling CE, Brown JR. 2016. Lung  
669 microbiome dynamics in copd exacerbations. *European Respiratory Journal* 47:1082-  
670 1092.
- 671 31. Cregger MA, Veach AM, Yang ZK, Crouch MJ, Vilgalys R, Tuskan GA, Schadt CW.  
672 2018. The *Populus* holobiont: Dissecting the effects of plant niches and genotype on the  
673 microbiome. *Microbiome* 6:31.

- 674 32. Edwards JA, Santos-Medellin CM, Liechty ZS, Nguyen B, Lurie E, Eason S, Phillips G,  
675 Sundaresan V. 2018. Compositional shifts in root-associated bacterial and archaeal  
676 microbiota track the plant life cycle in field-grown rice. *PLoS Biol* 16:e2003862.
- 677 33. Fitzpatrick CR, Copeland J, Wang PW, Guttman DS, Kotanen PM, Johnson MTJ. 2018.  
678 Assembly and ecological function of the root microbiome across angiosperm plant  
679 species. *Proc Natl Acad Sci USA* 115:E1157-E1165.
- 680 34. Marasco R, Rolli E, Fusi M, Michoud G, Daffonchio D. 2018. Grapevine rootstocks  
681 shape underground bacterial microbiome and networking but not potential functionality.  
682 *Microbiome* 6:3.
- 683 35. Wagner MR, Lundberg DS, del Rio TG, Tringe SG, Dangl JL, Mitchell-Olds T. 2016.  
684 Host genotype and age shape the leaf and root microbiomes of a wild perennial plant. *Nat*  
685 *Commun* 7:12151.
- 686 36. Herrera J, Poudel R, Bokati D. 2013. Assessment of root-associated fungal communities  
687 colonizing two species of tropical grasses reveals incongruence to fungal communities of  
688 North American native grasses. *Fungal Ecol* 6:65-69.
- 689 37. French E, Tran T, Iyer-Pascuzzi AS. 2020. Tomato genotype modulates selection and  
690 responses to root microbiota. *Phytobiomes Journal* doi:10.1094/pbiomes-02-20-0020-r.
- 691 38. Bulgarelli D, Schlaeppi K, Spaepen S, Ver Loren van Themaat E, Schulze-Lefert P.  
692 2013. Structure and functions of the bacterial microbiota of plants. *Annu Rev Plant Biol*  
693 64:807-38.
- 694 39. Hol WHG, Bezemer TM, Biere A. 2013. Getting the ecology into interactions between  
695 plants and the plant growth-promoting bacterium *Pseudomonas fluorescens*. *Front Plant*  
696 *Sci* 4:81.
- 697 40. Ortiz-Castro R, Contreras-Cornejo HA, Macias-Rodriguez L, Lopez-Bucio J. 2009. The  
698 role of microbial signals in plant growth and development. *Plant Signal Behav* 4:701-12.
- 699 41. Edwards J, Johnson C, Santos-Medellin C, Lurie E, Podishetty NK, Bhatnagar S, Eisen  
700 JA, Sundaresan V. 2015. Structure, variation, and assembly of the root-associated  
701 microbiomes of rice. *Proc Natl Acad Sci USA* 112:E911-E920.
- 702 42. Lundberg DS, Lebeis SL, Paredes SH, Yourstone S, Gehring J, Malfatti S, Tremblay J,  
703 Engelbrektson A, Kunin V, del Rio TG, Edgar RC, Eickhorst T, Ley RE, Hugenholtz P,  
704 Tringe SG, Dangl JL. 2012. Defining the core *Arabidopsis thaliana* root microbiome.  
705 *Nature* 488:86-90.
- 706 43. Wang P, Marsh EL, Ainsworth EA, Leakey ADB, Sheflin AM, Schachtman DP. 2017.  
707 Shifts in microbial communities in soil, rhizosphere and roots of two major crop systems  
708 under elevated CO<sub>2</sub> and O<sub>3</sub>. *Sci Rep* 7:15019.
- 709 44. Herrera J, Poudel R, Nebel KA, Collins SL. 2011. Precipitation increases the abundance  
710 of some groups of root-associated fungal endophytes in a semiarid grassland. *Ecosphere*  
711 2(4):art50.
- 712 45. Bokati D, Herrera J, Poudel R. 2016. Soil influences colonization of root-associated  
713 fungal endophyte communities of maize, wheat, and their progenitors. *J Mycol* 2016:1-9.
- 714 46. Meyer L. 2016. Grafting to increase high tunnel tomato productivity in the central united  
715 states. Master Thesis. <http://hdl.handle.net/2097/32736>.
- 716 47. Poudel R, Jumpponen A, Kennelly MM, Rivard CL, Gomez-Montano L, Garrett KA.  
717 2019. Rootstocks shape the rhizobiome: Rhizosphere and endosphere bacterial  
718 communities in the grafted tomato system. *Appl Environ Microbiol* 85:01765–01718.

- 719 48. Tibshirani R. 1996. Regression shrinkage and selection via the lasso. *Journal of the Royal*  
720 *Statistical Society Series B (Methodological)* 58:267-288.
- 721 49. Roguet A, Eren AM, Newton RJ, McLellan SL. 2018. Fecal source identification using  
722 random forest. *Microbiome* 6:185.
- 723 50. Belk A, Xu ZZ, Carter DO, Lynne A, Bucheli S, Knight R, Metcalf JL. 2018.  
724 Microbiome data accurately predicts the postmortem interval using random forest  
725 regression models. *Genes* 9(2):104.
- 726 51. Niu B, Paulson JN, Zheng XQ, Kolter R. 2017. Simplified and representative bacterial  
727 community of maize roots. *Proc Natl Acad Sci USA* 114:E2450-E2459.
- 728 52. Paredes SH, Gao TX, Law TF, Finkel OM, Mucyn T, Teixeira PJPL, Gonzalez IS,  
729 Feltcher ME, Powers MJ, Shank EA, Jones CD, Jojic V, Dangl JL, Castrillo G. 2018.  
730 Design of synthetic bacterial communities for predictable plant phenotypes. *Plos Biology*  
731 16.
- 732 53. Kurtz ZD, Muller CL, Miraldi ER, Littman DR, Blaser MJ, Bonneau RA. 2015. Sparse  
733 and compositionally robust inference of microbial ecological networks. *PLoS Comp Biol*  
734 11.
- 735 54. Friedman J, Alm EJ. 2012. Inferring correlation networks from genomic survey data.  
736 *PLoS Comput Biol* 8:e1002687.
- 737 55. Tackmann J, Matias Rodrigues JF, von Mering C. 2019. Rapid inference of direct  
738 interactions in large-scale ecological networks from heterogeneous microbial sequencing  
739 data. *Cell Syst* 9:286-296 e8.
- 740 56. Faust K, Raes J. 2016. Conet app: Inference of biological association networks using  
741 cytoscape. *F1000Res* 5:1519.
- 742 57. Gardes M, Bruns TD. 1993. ITS primers with enhanced specificity for basidiomycetes--  
743 application to the identification of mycorrhizae and rusts. *Mol Ecol* 2:113-8.
- 744 58. Ihrmark K, Bodeker ITM, Cruz-Martinez K, Friberg H, Kubartova A, Schenck J, Strid Y,  
745 Stenlid J, Brandstrom-Durling M, Clemmensen KE, Lindahl BD. 2012. New primers to  
746 amplify the fungal ITS2 region - evaluation by 454-sequencing of artificial and natural  
747 communities. *FEMS Microbiol Ecol* 82:666-677.
- 748 59. Schloss PD, Westcott SL, Ryabin T, Hall JR, Hartmann M, Hollister EB, Lesniewski RA,  
749 Oakley BB, Parks DH, Robinson CJ, Sahl JW, Stres B, Thallinger GG, Van Horn DJ,  
750 Weber CF. 2009. Introducing mothur: Open-source, platform-independent, community-  
751 supported software for describing and comparing microbial communities. *Appl Environ*  
752 *Microbiol* 75:7537-41.
- 753 60. Wang Q, Garrity GM, Tiedje JM, Cole JR. 2007. Naive bayesian classifier for rapid  
754 assignment of rRNA sequences into the new bacterial taxonomy. *Appl Environ Microbiol*  
755 73:5261-7.
- 756 61. Koljalg U, Nilsson RH, Abarenkov K, Tedersoo L, Taylor AFS, Bahram M, Bates ST,  
757 Bruns TD, Bengtsson-Palme J, Callaghan TM, Douglas B, Drenkhan T, Eberhardt U,  
758 Duenas M, Grebenc T, Griffith GW, Hartmann M, Kirk PM, Kohout P, Larsson E,  
759 Lindahl BD, Luecking R, Martin MP, Matheny PB, Nguyen NH, Niskanen T, Oja J, Peay  
760 KG, Peintner U, Peterson M, Poldmaa K, Saag L, Saar I, Schuessler A, Scott JA, Senes  
761 C, Smith ME, Suija A, Taylor DL, Telleria MT, Weiss M, Larsson KH. 2013. Towards a  
762 unified paradigm for sequence-based identification of fungi. *Mol Ecol* 22:5271-5277.
- 763 62. Friedman J, Alm EJ. 2012. Inferring correlation networks from genomic survey data.  
764 *PLoS Comput Biol* 8:e1002687.

- 765 63. Kuhn M. 2008. Building predictive models in r using the caret package. *Journal of*  
766 *Statistical Software* 28.
- 767 64. Oksanen J, Blanchet F, Friendly M, Kindt R, Legendre P, McGlenn D, Minchin P, O'Hara  
768 R, Simpson G, Solymos P, Stevens M, Szoecs E, Wagner H. 2018. *Vegan: Community*  
769 *ecology package*. R package version 2.4-6.:39pp.
- 770 65. McMurdie PJ, Holmes S. 2013. *Phyloseq: An r package for reproducible interactive*  
771 *analysis and graphics of microbiome census data*. *PLoS One* 8(4): e61217.
- 772 66. R Core Team. 2021. *R: A language and environment for statistical computing*. R  
773 *foundation for statistical computing, vienna, austria*. Url <https://www.R-project.Org>.
- 774 67. Bates D, Machler M, Bolker BM, Walker SC. 2015. Fitting linear mixed-effects models  
775 using lme4. *J Stat Softw* 67:1-48.
- 776 68. Ferreira JA. 2007. The benjamini-hochberg method in the case of discrete test statistics.  
777 *Int J Biostat* 3:Article 11.
- 778 69. Coleman-Derr D, Desgareignes D, Fonseca-Garcia C, Gross S, Clingenpeel S, Woyke T,  
779 North G, Visel A, Partida-Martinez LP, Tringe SG. 2016. Plant compartment and  
780 biogeography affect microbiome composition in cultivated and native *Agave* species.  
781 *New Phytol* 209:798-811.
- 782 70. Poli A, Lazzari A, Prigione V, Voyron S, Spadaro D, Varese GC. 2016. Influence of  
783 plant genotype on the cultivable fungi associated to tomato rhizosphere and roots in  
784 different soils. *Fungal Biol* 120:862-872.
- 785 71. Gottel NR, Castro HF, Kerley M, Yang ZM, Pelletier DA, Podar M, Karpinets T,  
786 Uberbacher E, Tuskan GA, Vilgalys R, Doktycz MJ, Schadt CW. 2011. Distinct  
787 microbial communities within the endosphere and rhizosphere of *Populus deltoides* roots  
788 across contrasting soil types. *Appl Environ Microbiol* 77:5934-5944.
- 789 72. Badri DV, Vivanco JM. 2009. Regulation and function of root exudates. *Plant Cell*  
790 *Environ* 32:666-681.
- 791 73. Dennis PG, Miller AJ, Hirsch PR. 2010. Are root exudates more important than other  
792 sources of rhizodeposits in structuring rhizosphere bacterial communities? *FEMS*  
793 *Microbiol Ecol* 72:313-27.
- 794 74. van der Heijden MG, Schlaeppli K. 2015. Root surface as a frontier for plant microbiome  
795 research. *Proc Natl Acad Sci USA* 112:2299-300.
- 796 75. Seitz VA, McGivern BB, Daly RA, Chaparro JM, Borton MA, Sheflin AM, Kresovich S,  
797 Shields L, Schipanski ME, Wrighton KC, Prenni JE. 2022. Variation in root exudate  
798 composition influences soil microbiome membership and function. *Appl Environ*  
799 *Microbiol* 88:e0022622.
- 800 76. Berg G, Opelt K, Zachow C, Lottmann J, Gotz M, Costa R, Smalla K. 2006. The  
801 rhizosphere effect on bacteria antagonistic towards the pathogenic fungus *Verticillium*  
802 *differs depending on plant species and site*. *FEMS Microbiol Ecol* 56:250-261.
- 803 77. Tian T, Reverdy A, She Q, Sun B, Chai Y. 2020. The role of rhizodeposits in shaping  
804 rhizomicrobiome.
- 805 78. Reazin C, Baird R, Clark S, Jumpponen A. 2019. Chestnuts bred for blight resistance  
806 depart nursery with distinct fungal rhizobiomes. *Mycorrhiza* 29:313-324.
- 807 79. Cardarelli M, Rouphael Y, Kyriacou MC, Colla G, Pane C. 2020. Augmenting the  
808 sustainability of vegetable cropping systems by configuring rootstock-dependent  
809 rhizomicrobiomes that support plant protection.



- 810 80. Nasholm T, Huss-Danell K, Hogberg P. 2000. Uptake of organic nitrogen in the field by  
811 four agriculturally important plant species. *Ecology* 81:1155-1161.
- 812 81. Reeve JR, Smith JL, Carpenter-Boggs L, Reganold JP. 2008. Soil-based cycling and  
813 differential uptake of amino acids by three species of strawberry (*Fragaria* spp.) plants.  
814 *Soil Biol Biochem* 40:2547-2552.
- 815 82. U'Ren N. 2007. Types, amounts, and possible functions of compounds released into the  
816 rhizosphere by soil-grown plants, p 1-21, *The rhizosphere*  
817 doi:10.1201/9781420005585.ch1. CRC Press.
- 818 83. Beattie GA. 2018. Metabolic coupling on roots. *Nat Microbiol* 3:396-397.
- 819 84. Zhalnina K, Louie KB, Hao Z, Mansoori N, da Rocha UN, Shi SJ, Cho HJ, Karaoz U,  
820 Loque D, Bowen BP, Firestone MK, Northen TR, Brodie EL. 2018. Dynamic root  
821 exudate chemistry and microbial substrate preferences drive patterns in rhizosphere  
822 microbial community assembly. *Nat Microbiol* 3:470-480.
- 823 85. Iannucci A, Canfora L, Nigro F, De Vita P, Beleggia R. 2021. Relationships between root  
824 morphology, root exudate compounds and rhizosphere microbial community in durum  
825 wheat. *Applied Soil Ecology* doi:10.1016/j.apsoil.2020.103781.
- 826 86. Warschefsky EJ, Klein LL, Frank MH, Chitwood DH, Londo JP, von Wettberg EJB,  
827 Miller AJ. 2016. Rootstocks: Diversity, domestication, and impacts on shoot phenotypes.  
828 *Trends Plant Sci* 21:418-437.
- 829 87. Malamy JE. 2005. Intrinsic and environmental response pathways that regulate root  
830 system architecture. *Plant Cell Environ* 28:67-77.
- 831 88. Song F, Bai F, Wang J, Wu L, Jiang Y, Pan Z. 2020. Influence of citrus scion/rootstock  
832 genotypes on arbuscular mycorrhizal community composition under controlled  
833 environment condition. *Plants* 9:1-16.
- 834 89. Cao X, Zhao D, Xu H, Huang R, Zeng J, Yu Z. 2018. Heterogeneity of interactions of  
835 microbial communities in regions of taihu lake with different nutrient loadings: A  
836 network analysis. *Sci Rep* 8:8890.
- 837 90. Carlson CJ, Zipfel CM, Garnier R, Bansal S. 2019. Global estimates of mammalian viral  
838 diversity accounting for host sharing. *Nat Ecol Evol* 3:1070-1075.
- 839 91. McGeachie MJ, Sordillo JE, Gibson T, Weinstock GM, Liu YY, Gold DR, Weiss ST,  
840 Litonjua A. 2016. Longitudinal prediction of the infant gut microbiome with dynamic  
841 bayesian networks. *Sci Rep* 6:20359.
- 842 92. Penalver Bernabe B, Cralle L, Gilbert JA. 2018. Systems biology of the human  
843 microbiome. *Curr Opin Biotechnol* 51:146-153.
- 844 93. Topcuoglu BD, Lesniak NA, Ruffin MTt, Wiens J, Schloss PD. 2020. A framework for  
845 effective application of machine learning to microbiome-based classification problems.  
846 *mBio* 11.
- 847 94. Efron B. 2020. Prediction, estimation, and attribution. *Journal of the American Statistical*  
848 *Association* 115:636-655.

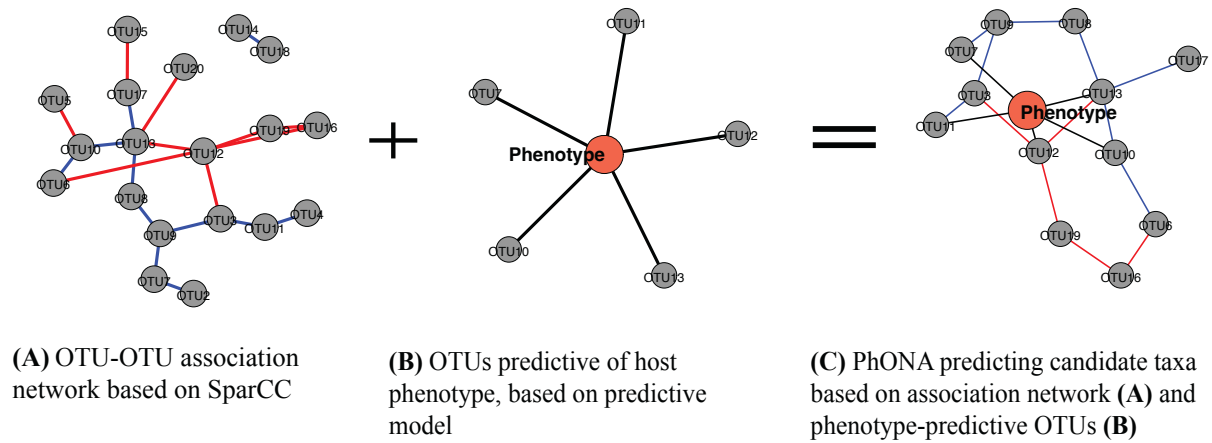

849

850 **FIG 1** The Phenotype-OTU network analysis (PhONA) combines (A) an OTU-OTU association

851 network with (B) the nodes selected based on predictive model for their association with a host

852 phenotype variable such as yield, to create (C) a PhONA.

853 (A)

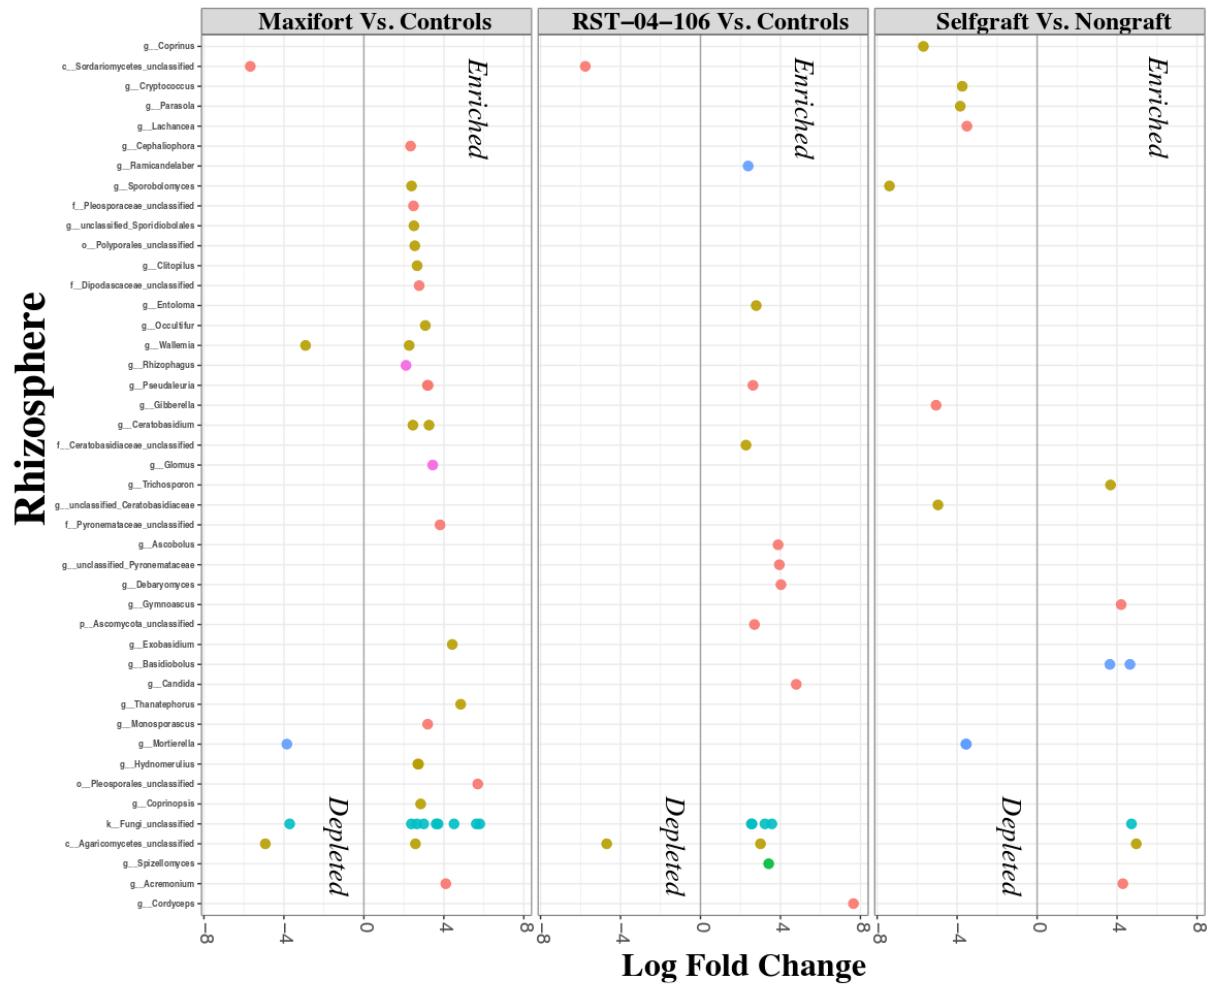

854  
855

856 (B)

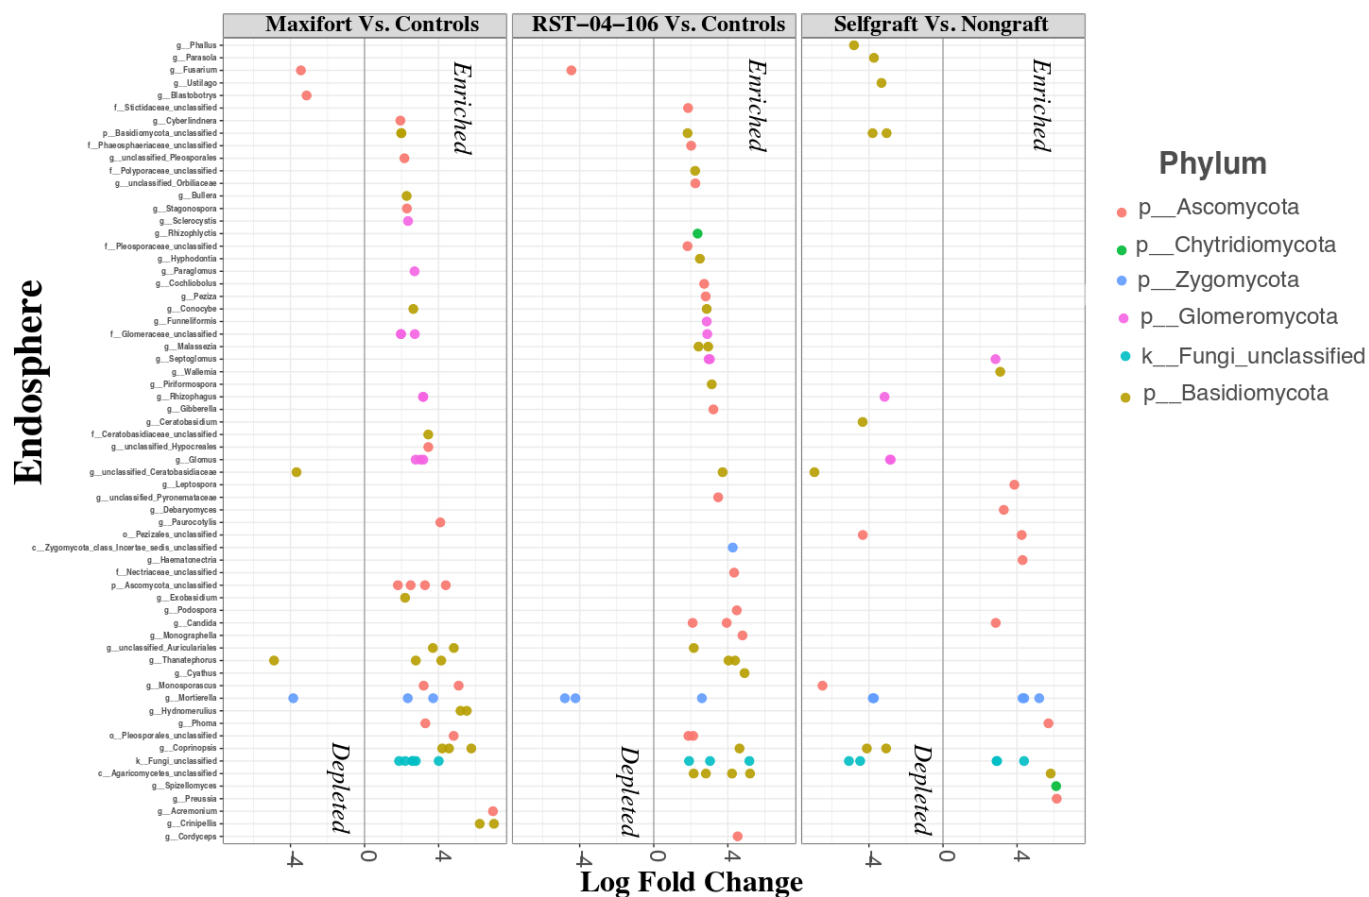

857

858 **FIG 2** Enriched and depleted OTUs across tomato rootstock genotype combinations (nongraft  
 859 BHN589, selfgraft BHN589, and BHN589 grafted on two hybrid rootstocks (RST-04-106 and  
 860 Maxifort)) evaluated for the rhizosphere (A) and the endosphere (B), using OTU counts from  
 861 selfgrafts and nongrafts as controls. All the tests were adjusted to control the false discovery rate  
 862 (FDR,  $p < 0.01$ ) using the Benjamini-Hochberg method. Each point represents an OTU labeled at  
 863 the genus level and colored based on phylum, and the position along the x-axis represents the  
 864 abundance fold-change contrast with controls (except for the selfgraft vs. nongraft comparison,  
 865 where the nongraft treatment was used as a control for the contrast).

866

867

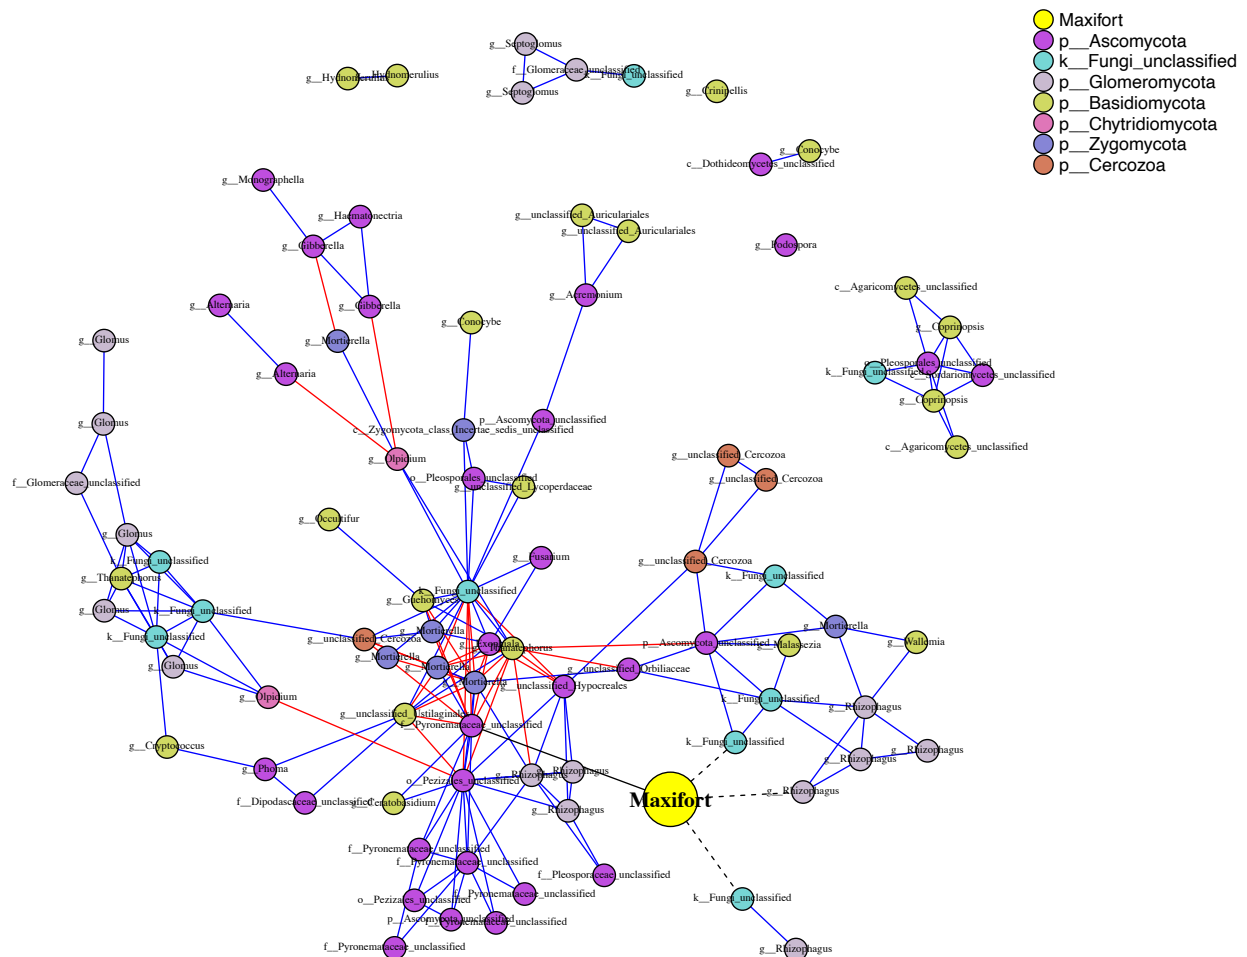

868

869 **FIG 3** Phenotype-OTU network analysis (PhONA) of endosphere fungal taxa for BHN589

870 grafted on Maxifort. Node color indicates the phylum, except that the yellow-color node

871 represents yield associated with the rootstock. Nodes connected to the rootstock yield node with

872 black links are taxa that were predictive of rootstock yield, where dotted and solid lines indicate

873 negative and positive associations with the yield node, respectively. Red and blue links represent

874 negative and positive associations, respectively, between OTUs. Nodes are labeled with the

875 finest-resolution taxonomic categorization available.

876

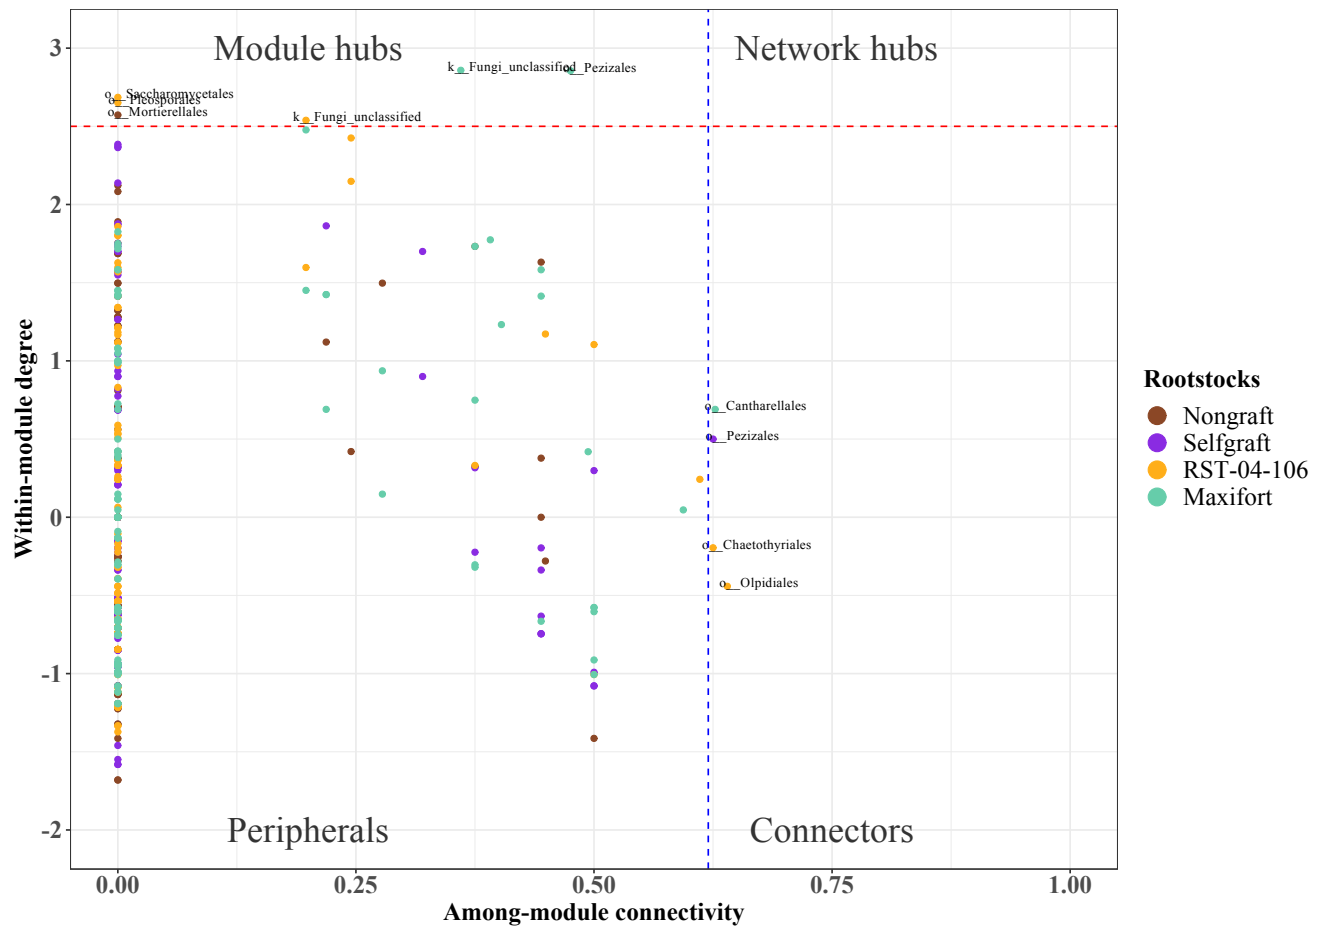

877

878

879 **FIG 4** Partitioning of endosphere fungal OTUs according to their network roles. Nodes were

880 divided into four categories based on within-module degree and among-module connectivity.

881 The blue dashed line represents a threshold value (0.62) for among-module connectivity, and the

882 red dashed line represents a threshold value (2.5) for within-module degree. Nodes were

883 categorized as peripherals, connectors, module hubs, and network hubs. Node color indicates

884 rootstock treatment (nongraft BHN589, selfgraft BHN589, and BHN589 grafted on two hybrid

885 rootstocks (RST-04-106 and Maxifort)).

886

887  
888  
889

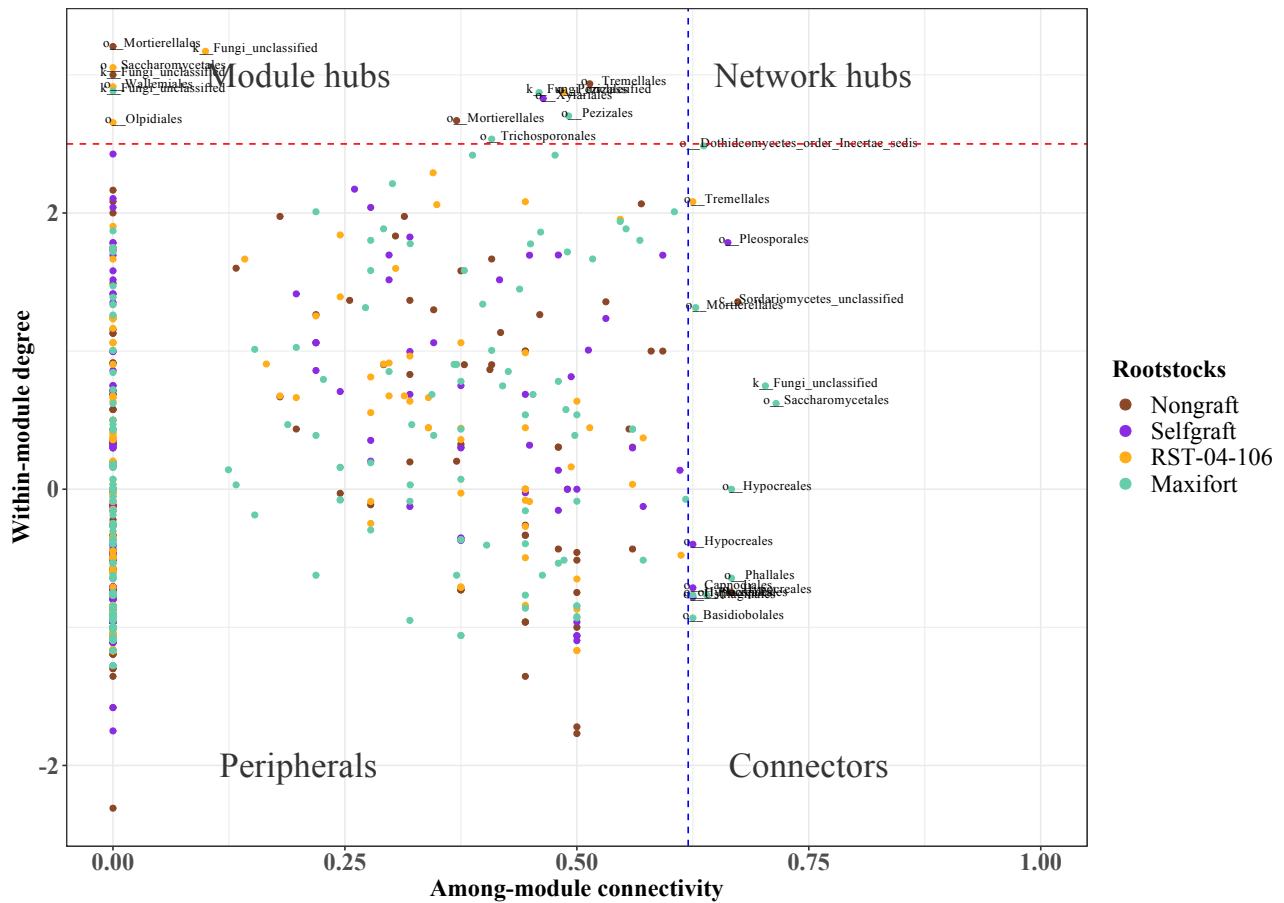

890  
891  
892  
893  
894  
895  
896  
897  
898  
899

**FIG 5** Partitioning of rhizosphere fungal OTUs according to their network roles. Nodes were divided into four categories based on within-module degree and among-module connectivity. The blue dashed line represents a threshold value (0.62) for among-module connectivity, and the red dashed line represents a threshold value (2.5) for within-module degree. Nodes were categorized as peripherals, connectors, module hubs, and network hubs. Node color indicates rootstock treatment (nongraft BHN589, selfgraft BHN589, and BHN589 grafted on two hybrid rootstocks (RST-04-106 and Maxifort)).

900

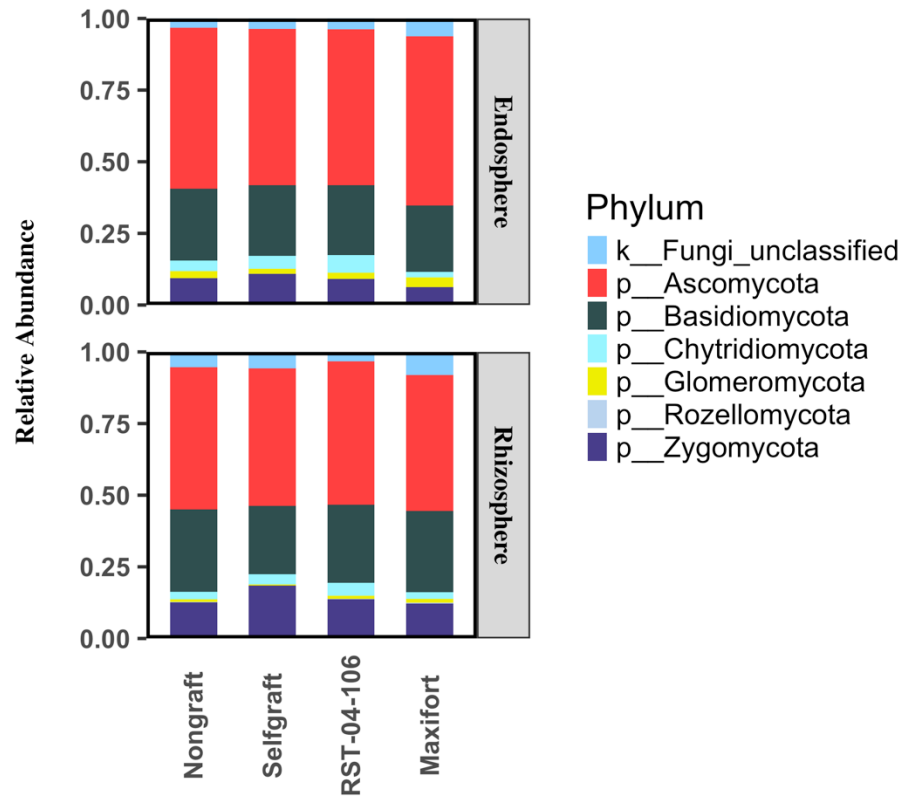

901

902 **FIG S1** Relative abundance of endosphere and rhizosphere fungi at the phylum level recovered  
903 from four tomato rootstock treatments: nongraft BHN589, selfgraft BHN589, and BHN589  
904 grafted on two hybrid rootstocks (RST-04-106 and Maxifort). Each individual bar represents a  
905 rootstock treatment, and the colored area within the bar represents the relative abundance of the  
906 corresponding phylum.

907



908 (A)

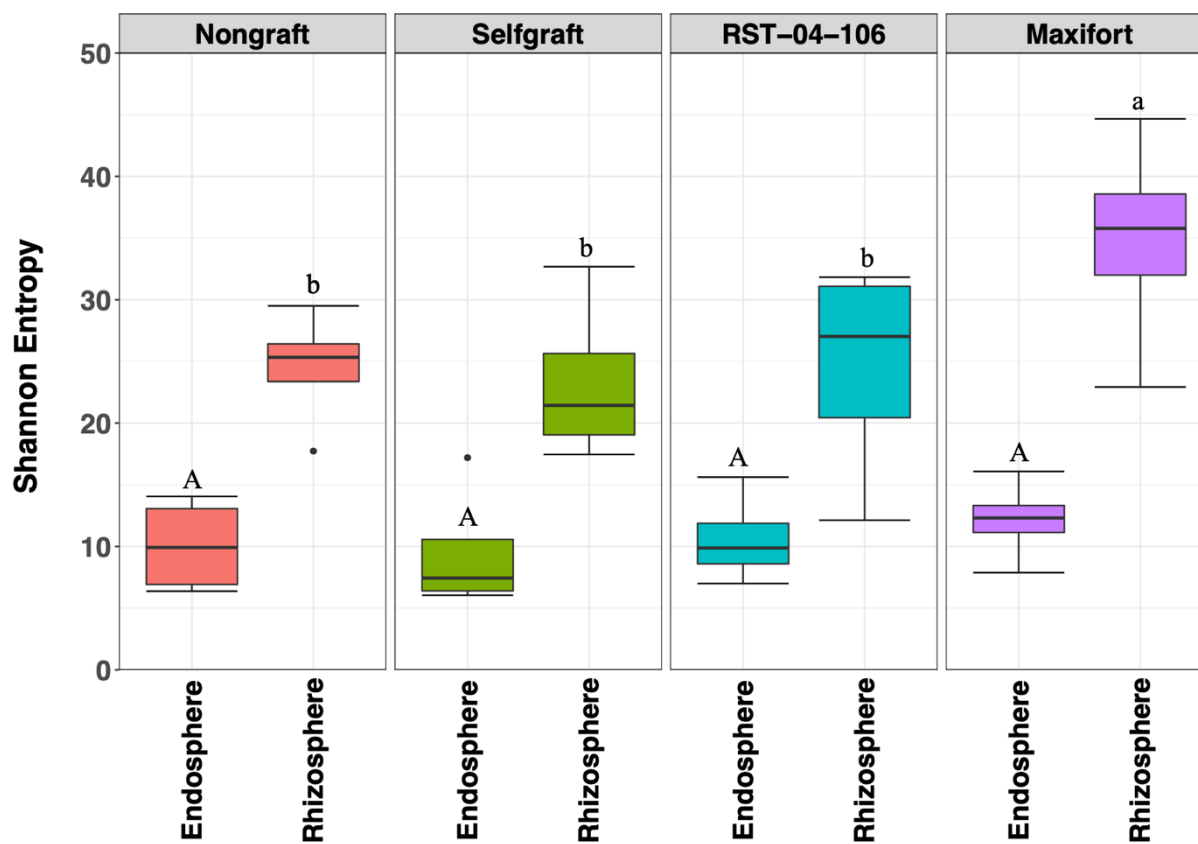

909

910

911 (B)

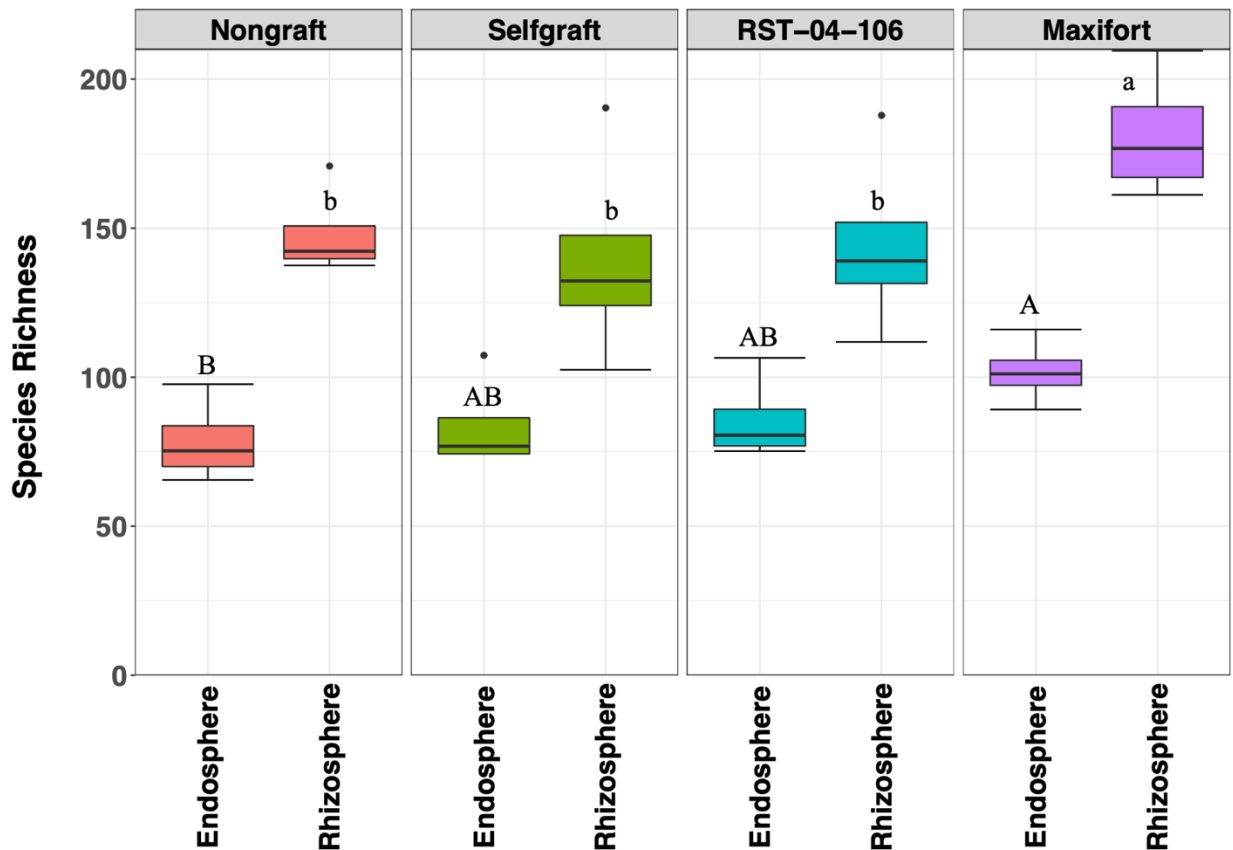

912

913

914 **FIG S2** Comparison of overall fungal diversity (A) and richness (B) associated with tomato

915 rootstock genotypes and controls, evaluated in the endosphere and rhizosphere. The plot is

916 divided by the four tomato rootstock treatments: nongraft BHN589, selfgraft BHN589, and

917 BHN589 grafted on two hybrid rootstocks (RST-04-106 and Maxifort). Shannon entropy and

918 species richness, measures of community diversity, were both higher for Maxifort ( $p < 0.005$ )

919 compared to the self-graft and RST-04-106 in the rhizosphere, while there was not evidence for a

920 difference in Shannon entropy in the endosphere ( $p = 0.634$ ). Treatment means were separated

921 using the "diffsmeans" function as specified in the lmerTest package in R. Tests for boxplots

922 sharing a letter or letter case type had  $p > 0.05$ .

923

924

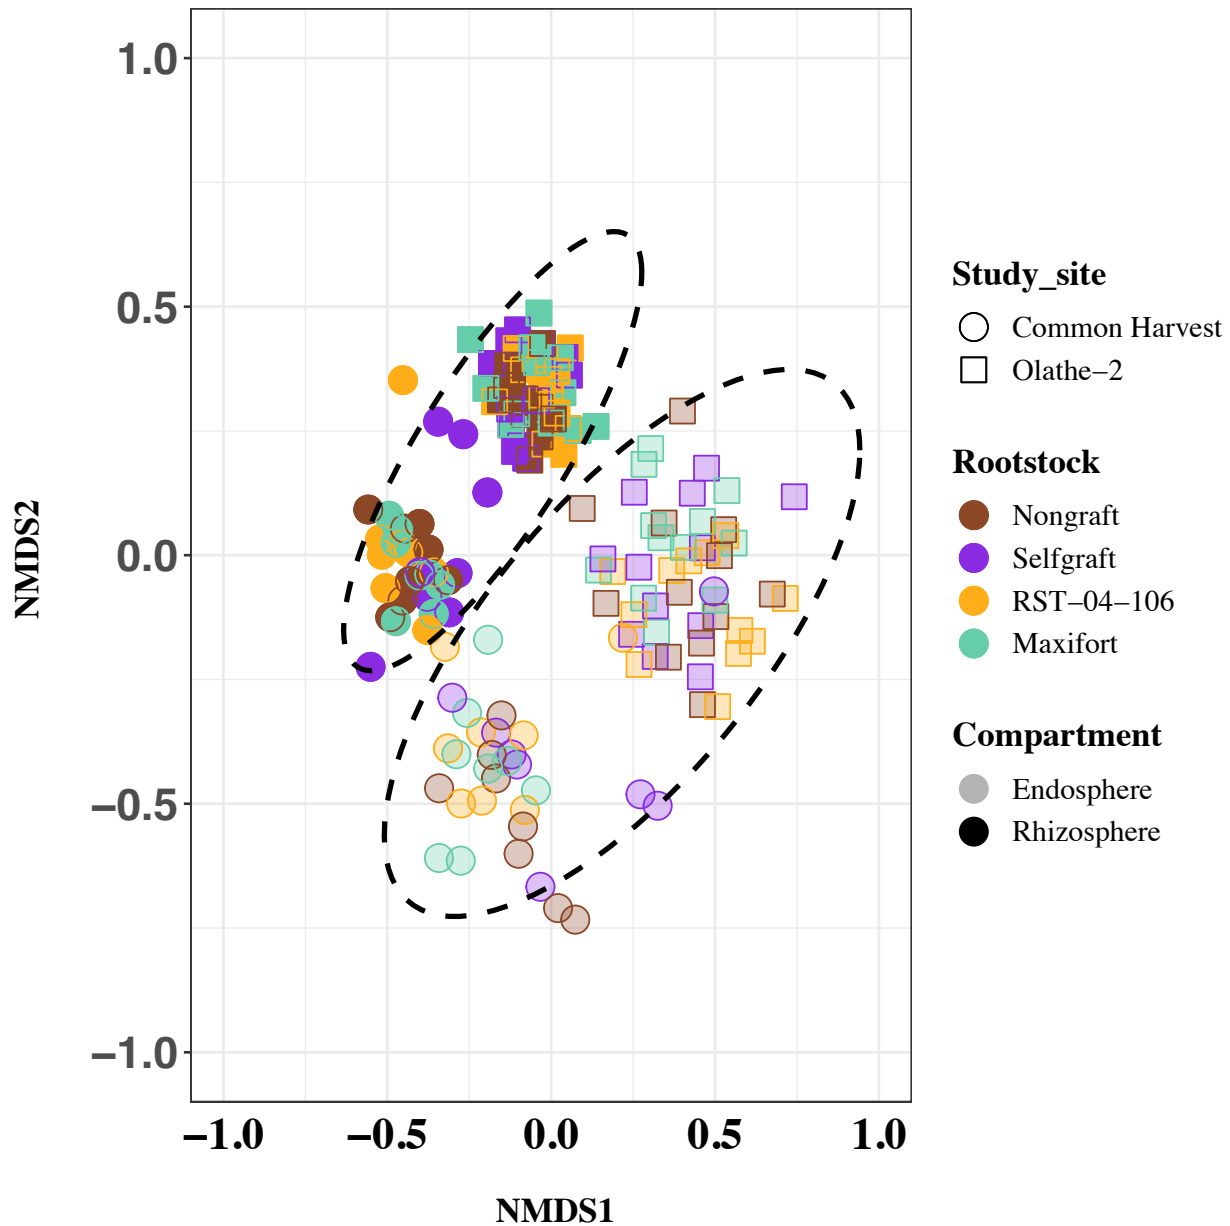

925

926 **FIG S3** Non-metric multidimensional scaling (NMDS) ordination plot of samples labeled by  
927 tomato rootstock (nongraft BHN589, selfgraft BHN589, and BHN589 grafted on two hybrid  
928 rootstocks (RST-04-106 and Maxifort)), compartment (endosphere or rhizosphere), and study  
929 site, based on the Bray-Curtis dissimilarity distance matrix of fungal OTUs. Color indicates  
930 rootstock treatment, shape indicates study site, and size indicates compartment. Ellipses

931 surrounding the samples indicate the 95% CI of the endosphere and rhizosphere sample  
932 centroids.  
933

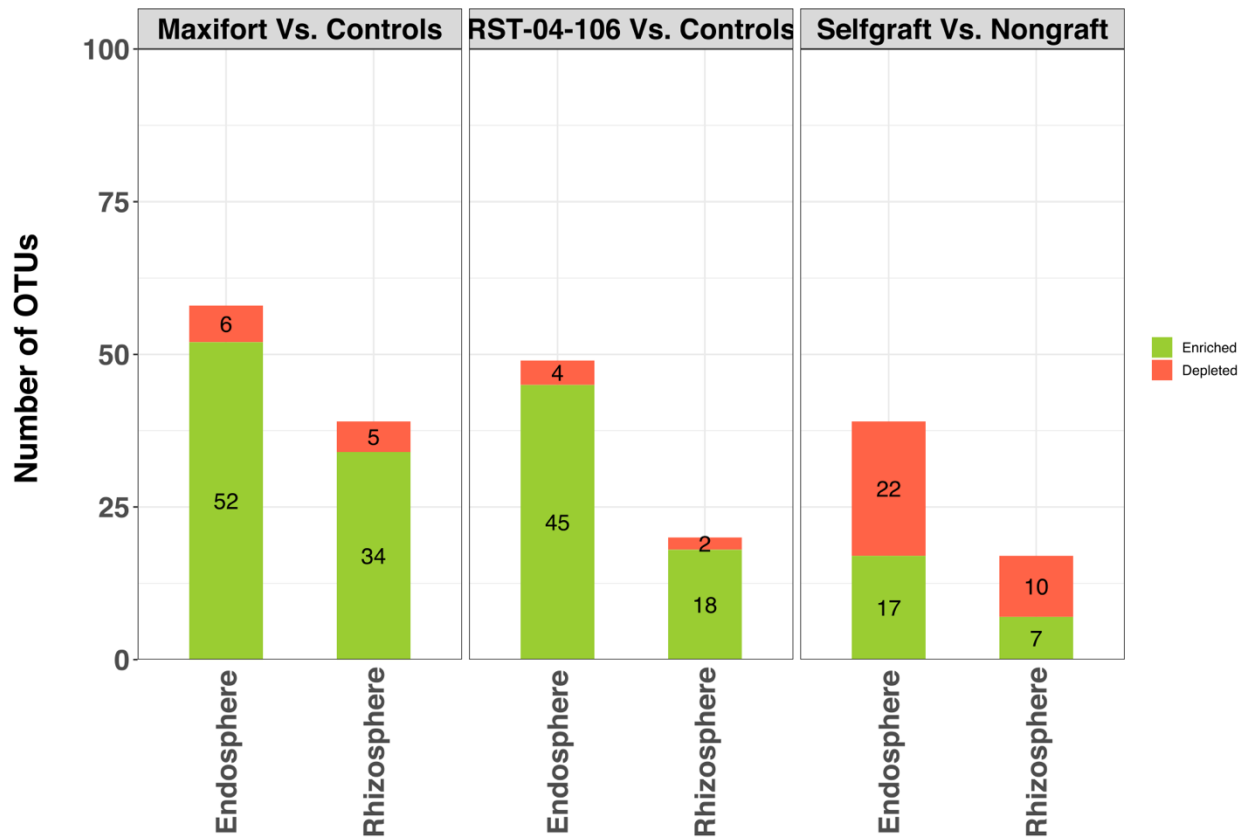

934  
935 **FIG S4** Number of DAOTUs in a contrast analysis, evaluated for the endosphere and  
936 rhizosphere compartments for four tomato rootstock treatments: nongraft and selfgraft BHN589,  
937 and BHN589 grafted on two hybrid rootstocks (Maxifort and RST-04-106). The green color in  
938 each bar represents the number of enriched taxa, and the red color represents the number of  
939 depleted taxa. The number of differentially changed taxa was greater for the endosphere than for  
940 the rhizosphere. Among the contrast pairs, hybrid rootstocks had a greater number of enriched  
941 taxa compared to depleted taxa. However, the number of depleted taxa was higher compared to  
942 enriched taxa in the controls. Among the treatments, Maxifort had the highest number of  
943 DAOTUs in both compartments.  
944

945 A)

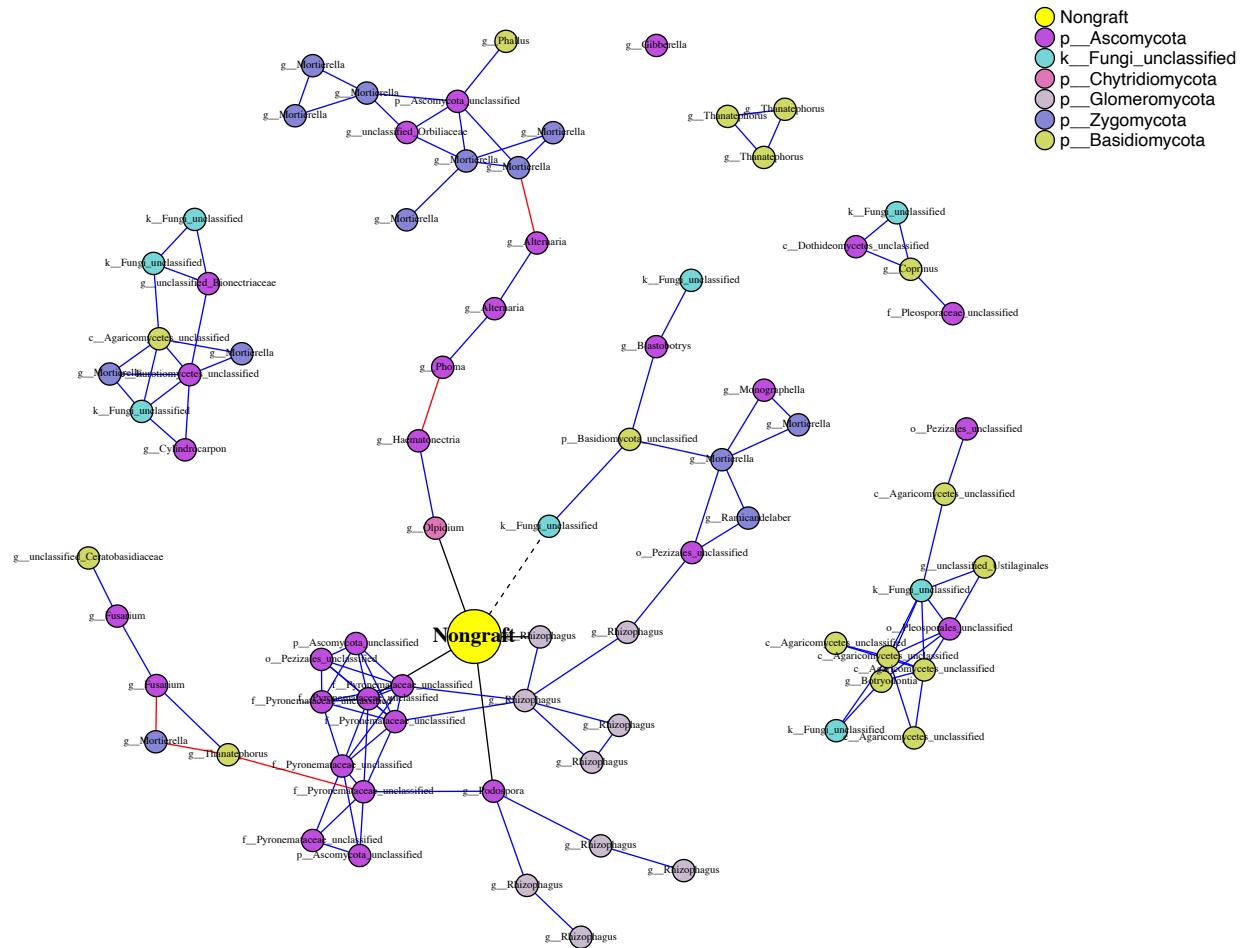

946  
947

948 B)

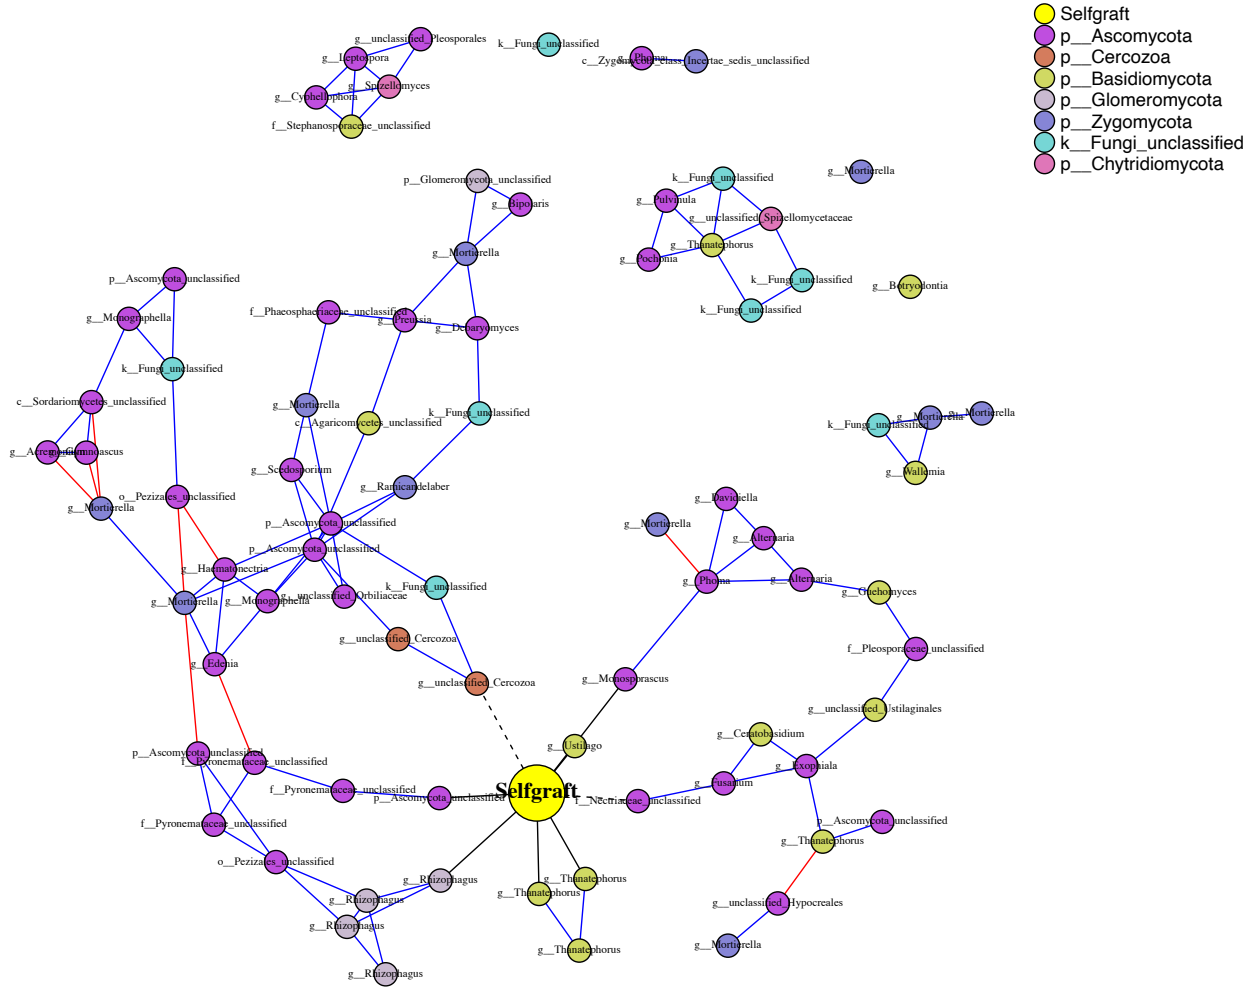

949  
950



951 C)

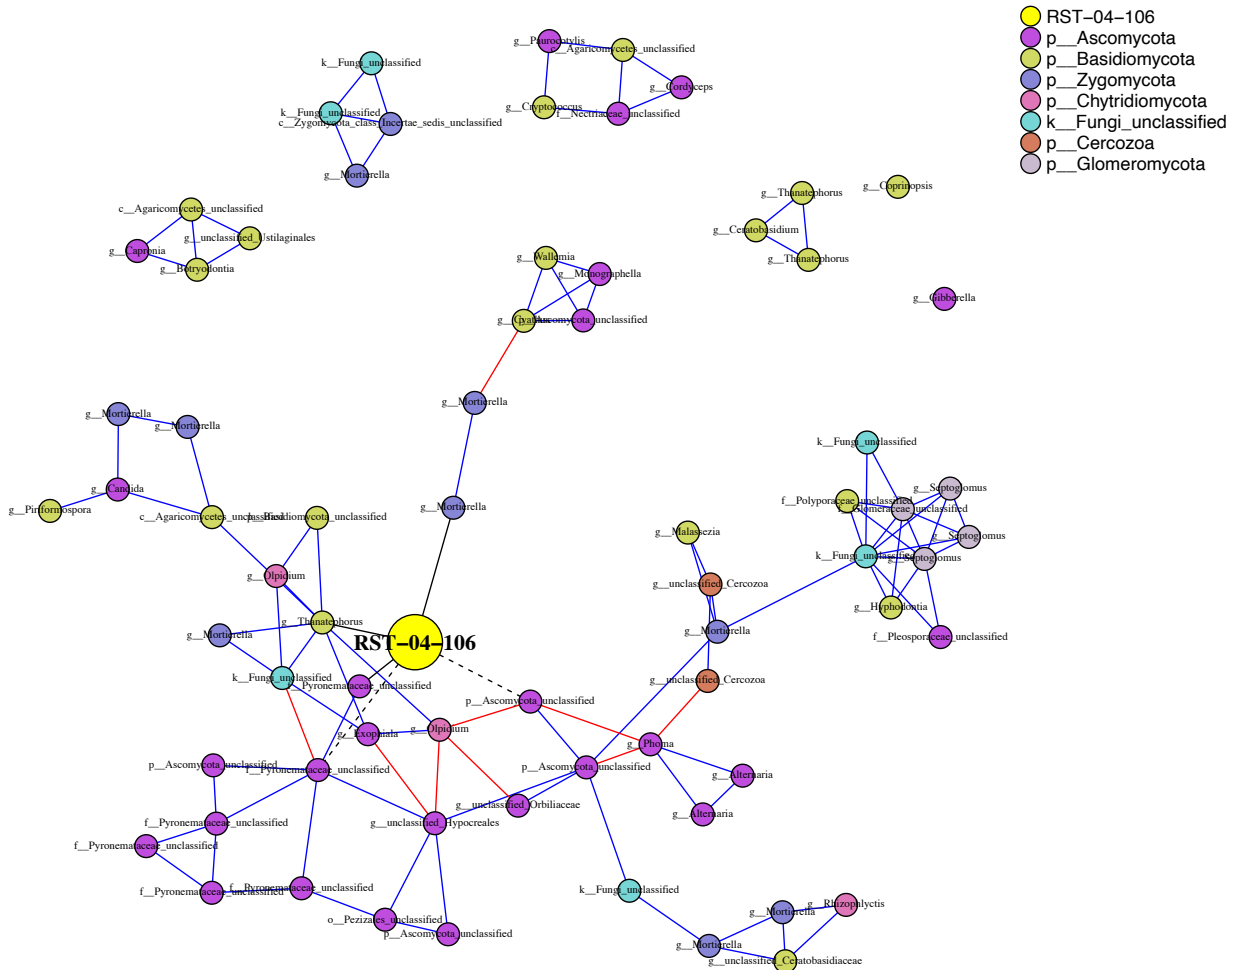

952

953 **FIG S5** Phenotype-OTU network analysis (PhONA) of **endosphere** fungal taxa for tomato

954 rootstock treatments: (A) nongraft and (B) selfgraft BHN589, and (C) BHN589 grafted on RST-

955 04-106. Node color indicates the phylum, except that the yellow-color node represents yield

956 associated with the rootstock. Nodes connected to the rootstock yield node with black links are

957 taxa that were predictive of rootstock yield, where dotted and solid lines indicate negative and

958 positive associations with the yield node, respectively. Red and blue links represent negative and

959 positive associations, respectively, between OTUs. Nodes are labeled with the finest-resolution

960 taxonomic categorization available.

961

962 A)

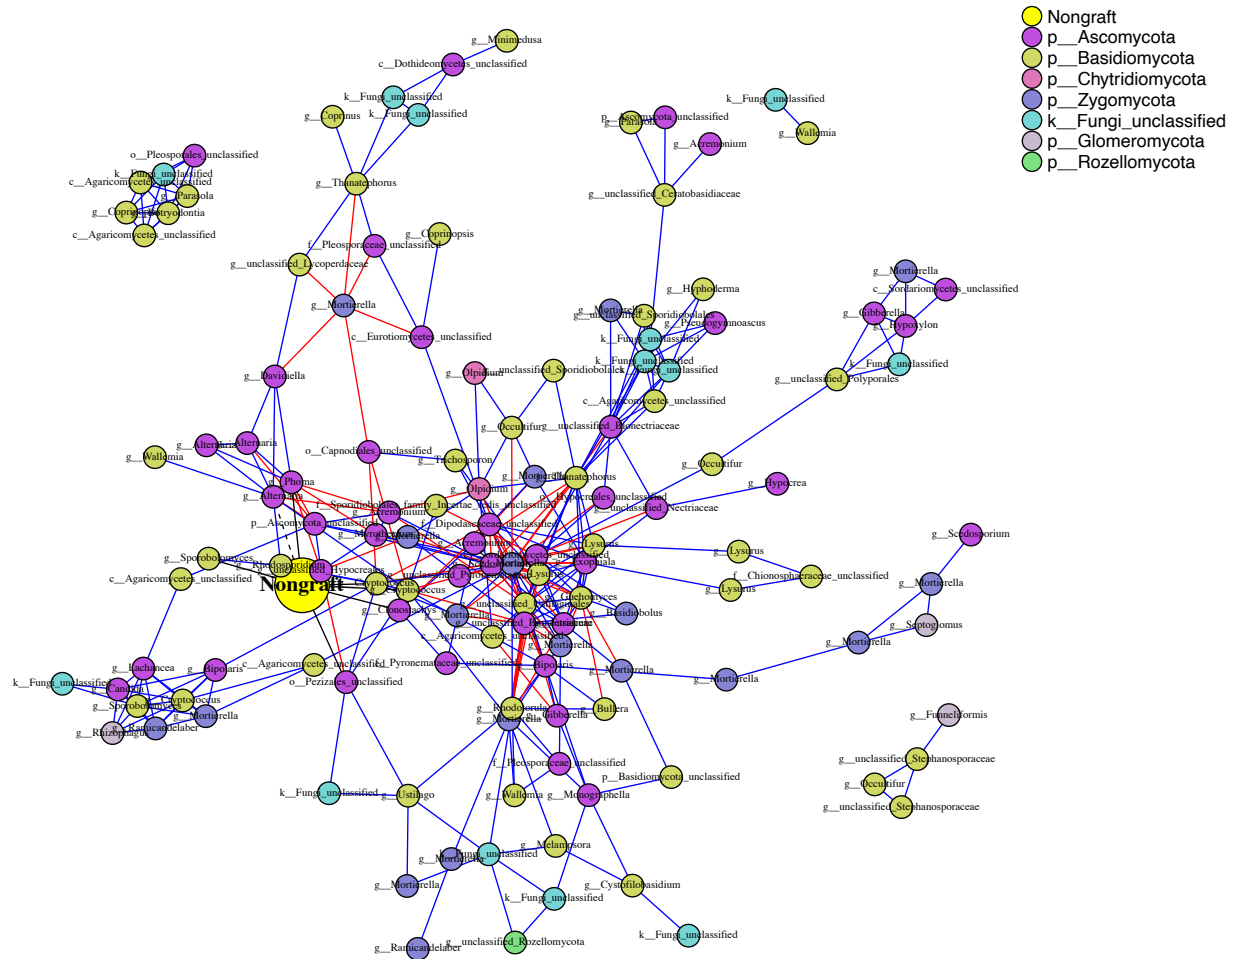

963  
964

965 B)

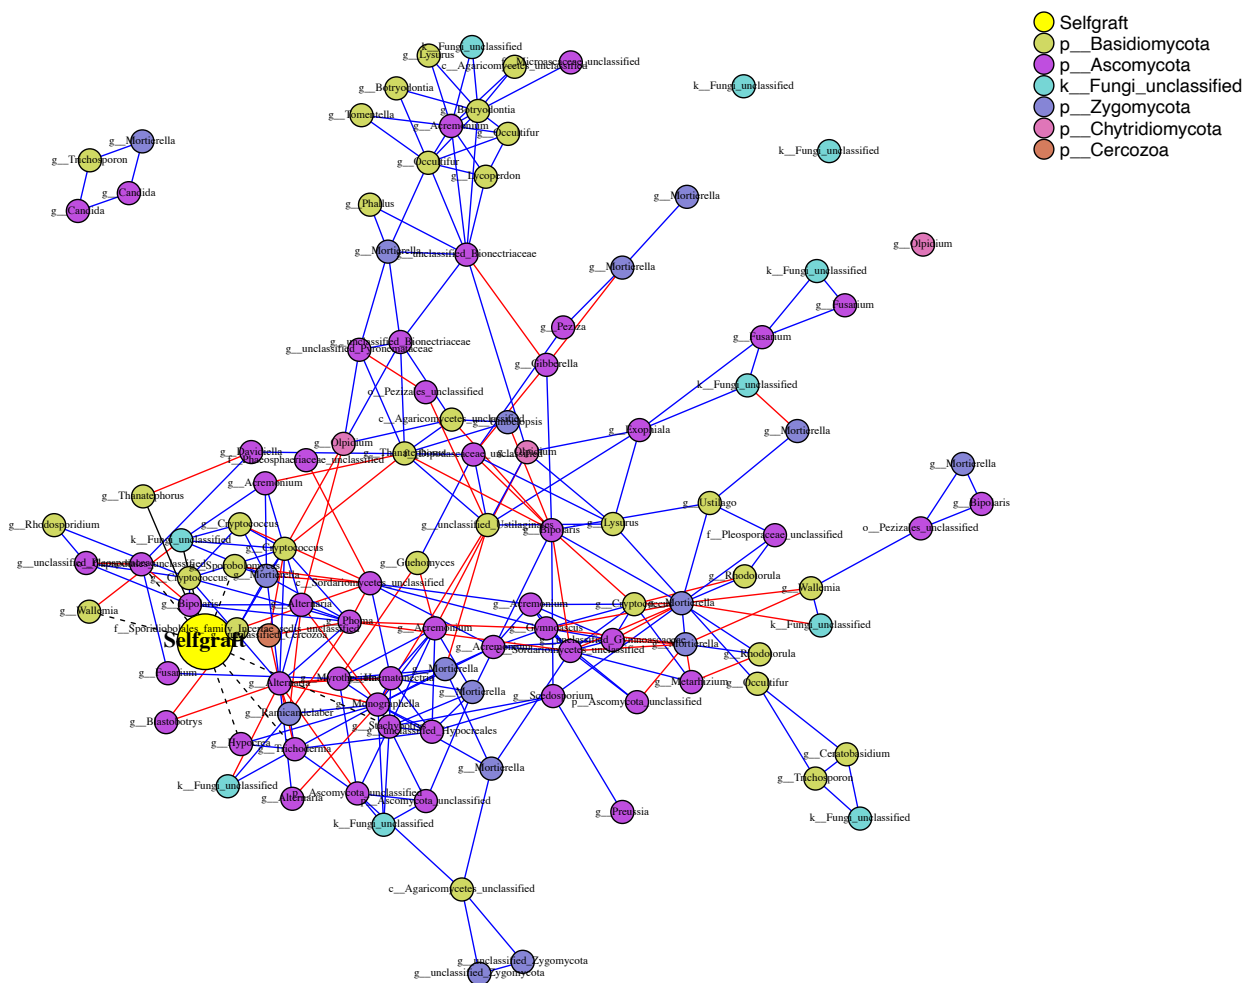

966  
967

968 C)

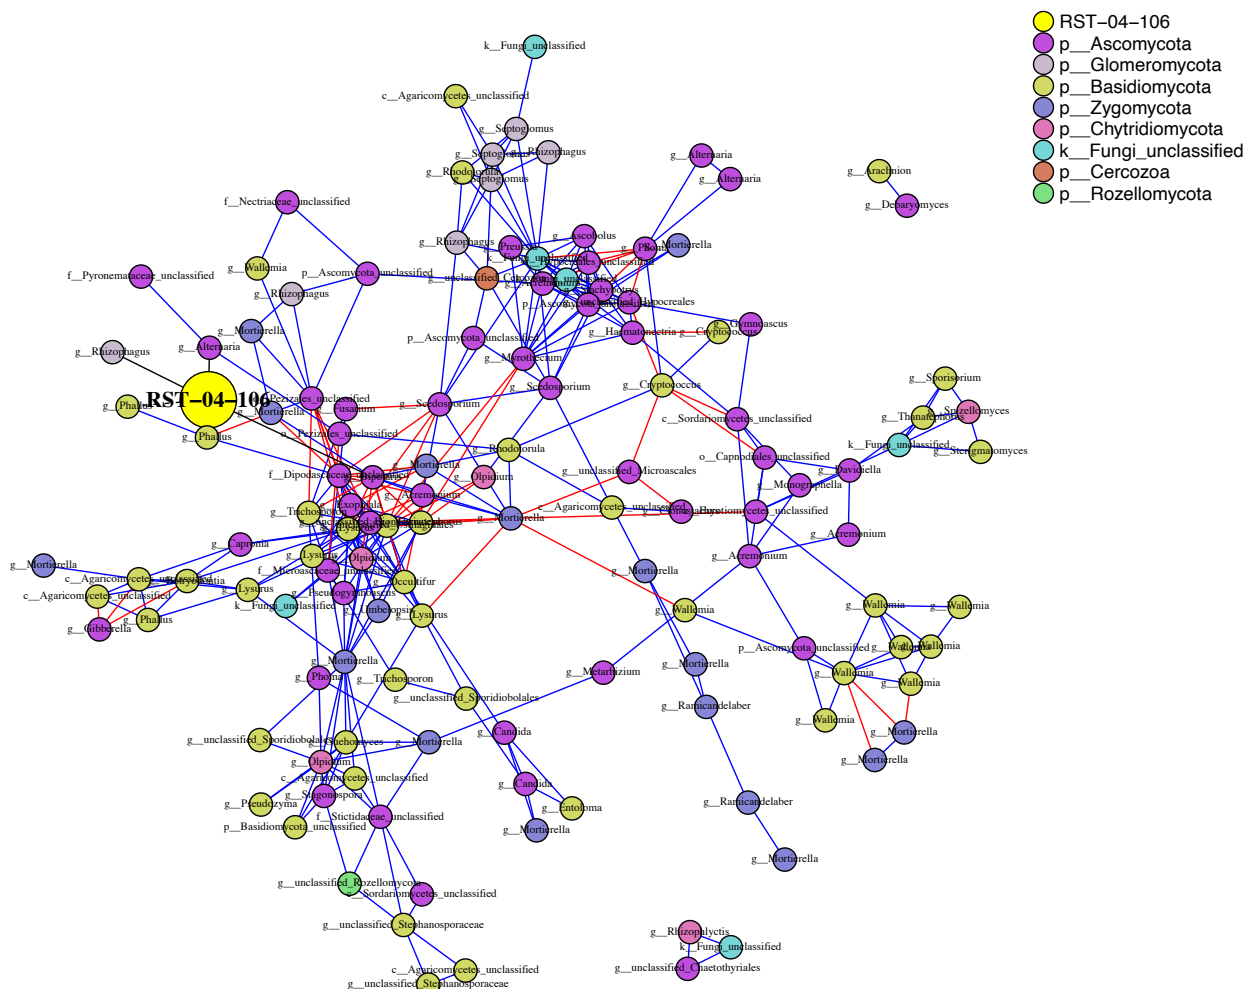

969  
970

971 D)

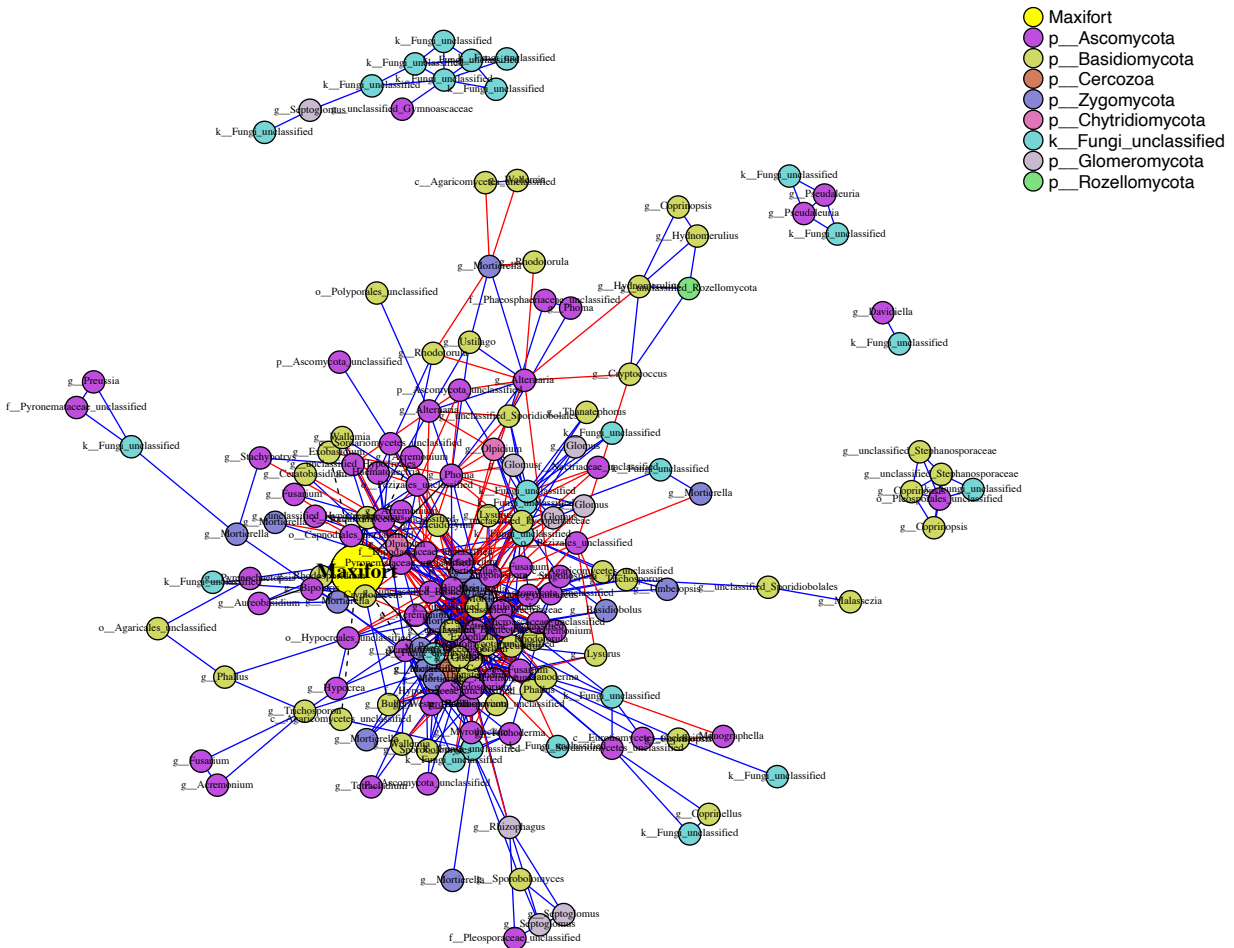

972

973 **FIG S6** Phenotype-OTU network analysis (PhONA) of **rhizosphere** fungal taxa for tomato

974 rootstock treatments: (A) nongraft and (B) selfgraft BHN589, and BHN589 grafted on two

975 hybrid rootstocks ((C) RST-04-106 and (D) Maxifort). Node color indicates the phylum, except

976 that the tomato-color node represents yield associated with the rootstock. Nodes connected to the

977 rootstock yield node with black links are taxa that were predictive of rootstock yield, where

978 dotted and solid lines indicate negative and positive associations with the yield node,

979 respectively. Red and blue links represent negative and positive associations, respectively,

980 between OTUs. Nodes are labeled with the finest-resolution taxonomic categorization available.

981 **TABLE S1** Sites included in the study, their soil type, and geographic coordinates.

982

| Study sites                                               | Location           | Latitude | Longitude | Soil type           |
|-----------------------------------------------------------|--------------------|----------|-----------|---------------------|
| Olathe Horticulture Research and Extension Center (OHREC) | Johnson County, KS | 38.88N   | 94.99W    | Chase silt loam     |
| Common Harvest                                            | Douglas County, KS | 38.96N   | 95.20W    | Eudora-Kimo complex |

983

984 **TABLE S2** Results of the multivariate permutational analysis of variance (PERMANOVA) for  
 985 fungal taxon abundance data. Permutation was based on the Bray-Curtis distance matrix  
 986 generated for root associated fungal communities at the OTU level from four tomato rootstock  
 987 treatments: nongraft and selfgraft BHN589, and BHN589 grafted on two hybrid rootstocks  
 988 (Maxifort and RST-04-106) (1000 permutations). P values < 0.05 are in bold.

| Factor                                 | Sum of Squares | % Explained | P value        |
|----------------------------------------|----------------|-------------|----------------|
| Rootstocks                             | 1.24           | 2.07        | < <b>0.01</b>  |
| Compartment                            | 5.36           | 8.92        | < <b>0.001</b> |
| Study_Site                             | 5.01           | 8.34        | < <b>0.001</b> |
| Year                                   | 3.23           | 5.38        | < <b>0.001</b> |
| Rootstocks:Compartment                 | 0.58           | 0.97        | 0.972          |
| Rootstocks:Study_Site                  | 1.39           | 2.32        | < <b>0.01</b>  |
| Compartment:Study_Site                 | 1.59           | 2.65        | < <b>0.001</b> |
| Rootstocks:Year                        | 1.00           | 1.66        | 0.111          |
| Compartment:Year                       | 1.00           | 1.66        | < <b>0.001</b> |
| Study_Site:Year                        | 1.46           | 2.43        | < <b>0.001</b> |
| Rootstocks:Compartment:Study_Site      | 0.55           | 0.91        | 0.998          |
| Rootstocks:Compartment:Year            | 0.49           | 0.82        | 1.000          |
| Rootstocks:Study_Site:Year             | 1.22           | 2.03        | < <b>0.01</b>  |
| Compartment:Study_Site:Year            | 0.60           | 1.00        | < <b>0.01</b>  |
| Rootstocks:Compartment:Study_Site:Year | 0.60           | 1.00        | 0.989          |
| Residuals                              | 34.75          | 57.86       |                |
| Total                                  | 60.07          | 100.01      |                |

989

**TABLE S3** Network attributes and links observed in the fungal association networks for four tomato rootstock treatments: nongraft and selfgraft BHN589, and BHN589 grafted on two hybrid rootstocks (Maxifort and RST-04-106) in each of rhizosphere and endosphere compartments.

| <b>Compartment</b> | <b>Rootstocks</b> | <b>N</b> | <b>Node</b> | <b>Edge</b> | <b>Node Degree</b> | <b>Density</b> | <b>Modules (SA)</b> | <b>Negative Edge</b> | <b>Pe</b> |
|--------------------|-------------------|----------|-------------|-------------|--------------------|----------------|---------------------|----------------------|-----------|
| Endosphere         | Nongraft          | 20       | 78          | 112         | 1.6                | 0.04           | 10                  | 5                    |           |
|                    | Selfgraft         | 20       | 115         | 115         | 1.4                | 0.04           | 11                  | 9                    |           |
|                    | RST-04-106        | 20       | 71          | 110         | 1.5                | 0.04           | 11                  | 9                    |           |
|                    | Maxifort          | 20       | 92          | 182         | 2.0                | 0.04           | 10                  | 32                   |           |
| Rhizosphere        | Nongraft          | 20       | 132         | 337         | 2.6                | 0.04           | 12                  | 72                   |           |
|                    | Selfgraft         | 20       | 113         | 272         | 2.4                | 0.04           | 9                   | 63                   |           |
|                    | RST-04-106        | 20       | 133         | 338         | 2.5                | 0.04           | 11                  | 54                   |           |
|                    | Maxifort          | 20       | 173         | 740         | 4.3                | 0.04           | 11                  | 279                  |           |
